# Supplementary material for: Chemical generation of o-quinone monoimines for the rapid construction of 1,4-benzoxazine derivatives
Source: Royal Society of Chemistry journal article supplement (doi:10.1039/c2ob06681e), 2012-01-01

## Electronic Supplementary Information

(File. 2)

### Chemical generation of *o*-quinone monoimines for the rapid construction of 1,4-benzoxazine derivatives

Naganjaneyulu Bodipati and Rama Krishna Peddinti\*

*Department of Chemistry, Indian Institute of Technology, Roorkee-247 667,  
Uttarakhand, India.*

#### Table of Contents

|                                                           |            |
|-----------------------------------------------------------|------------|
| <sup>1</sup> H NMR (500 MHz) spectra of all products..... | S-2 – S-25 |
|-----------------------------------------------------------|------------|

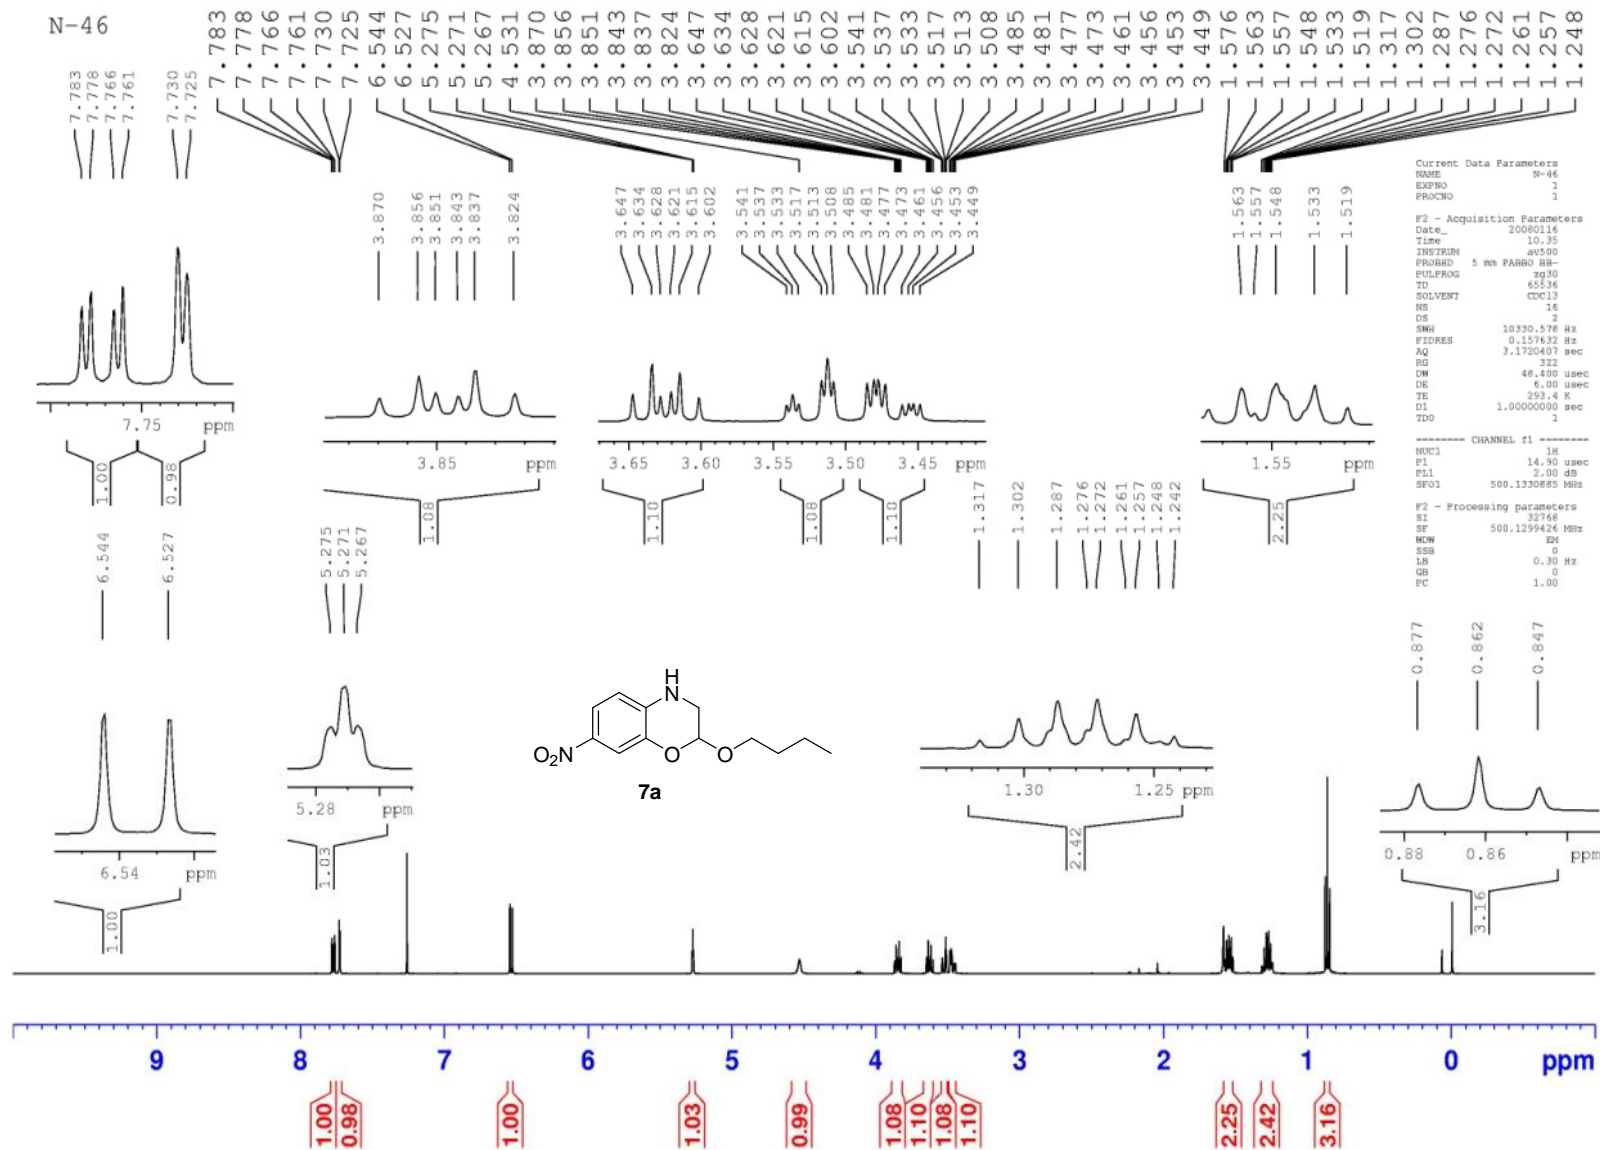

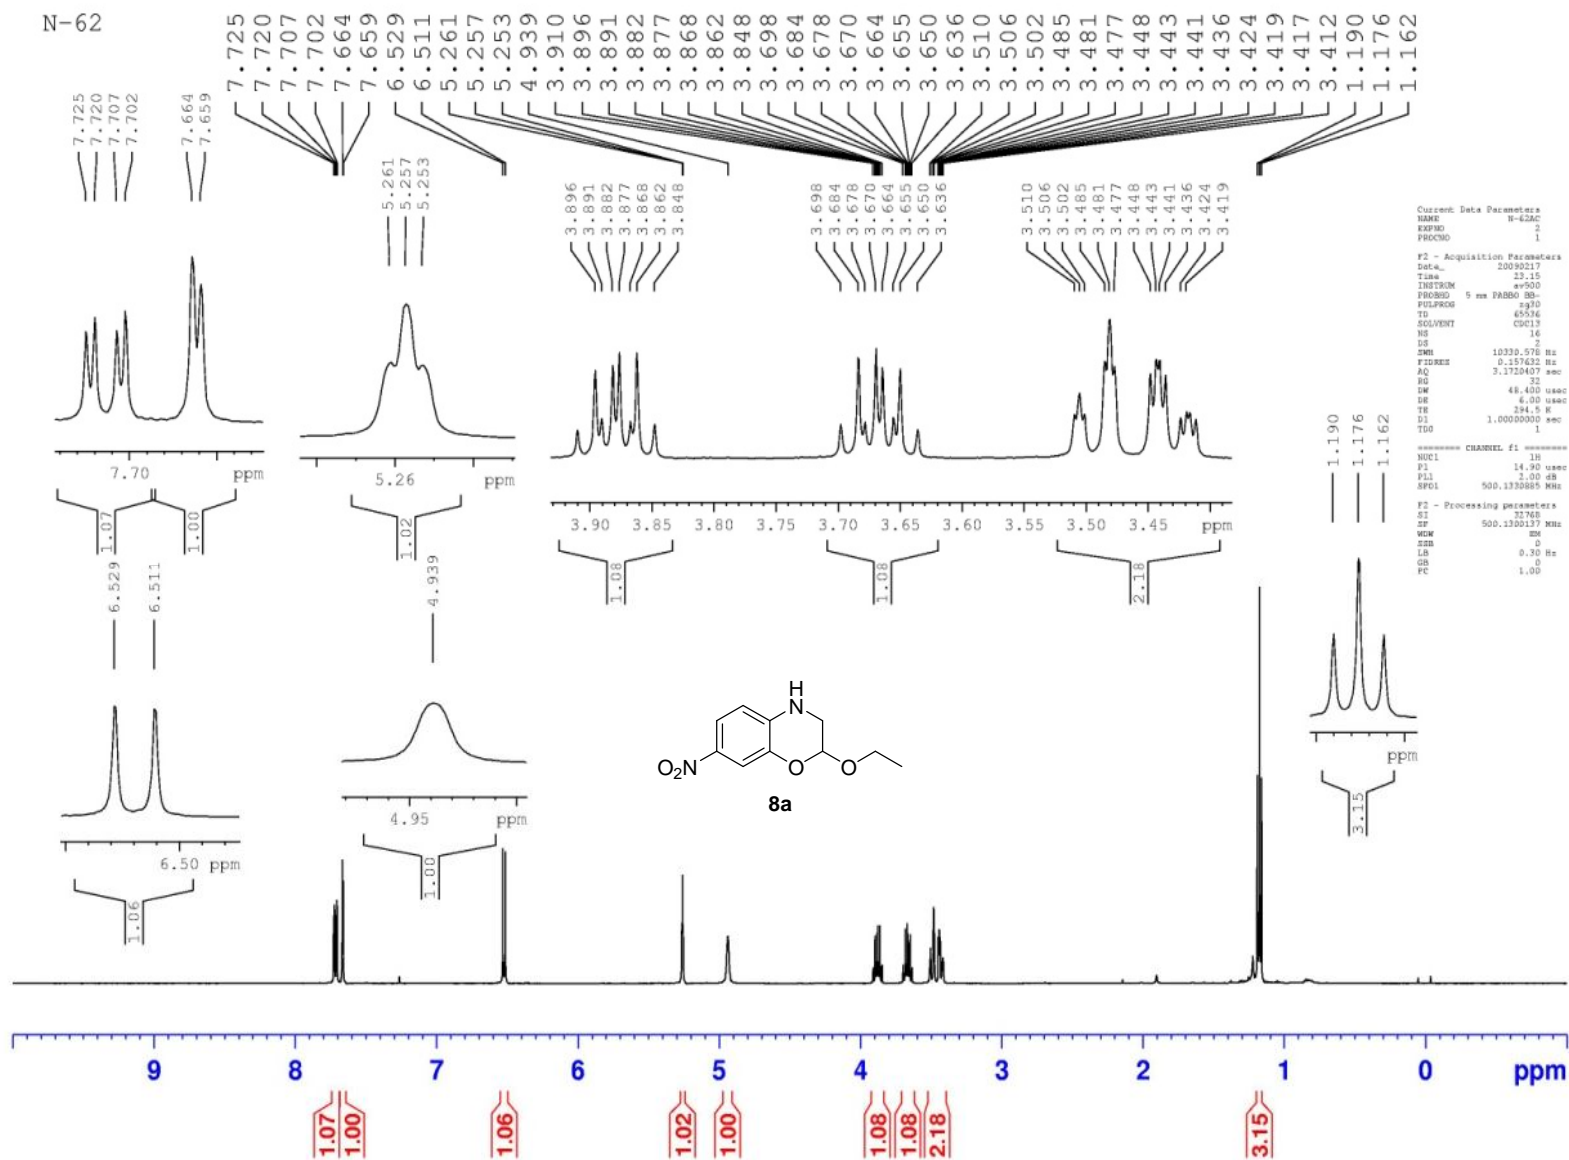

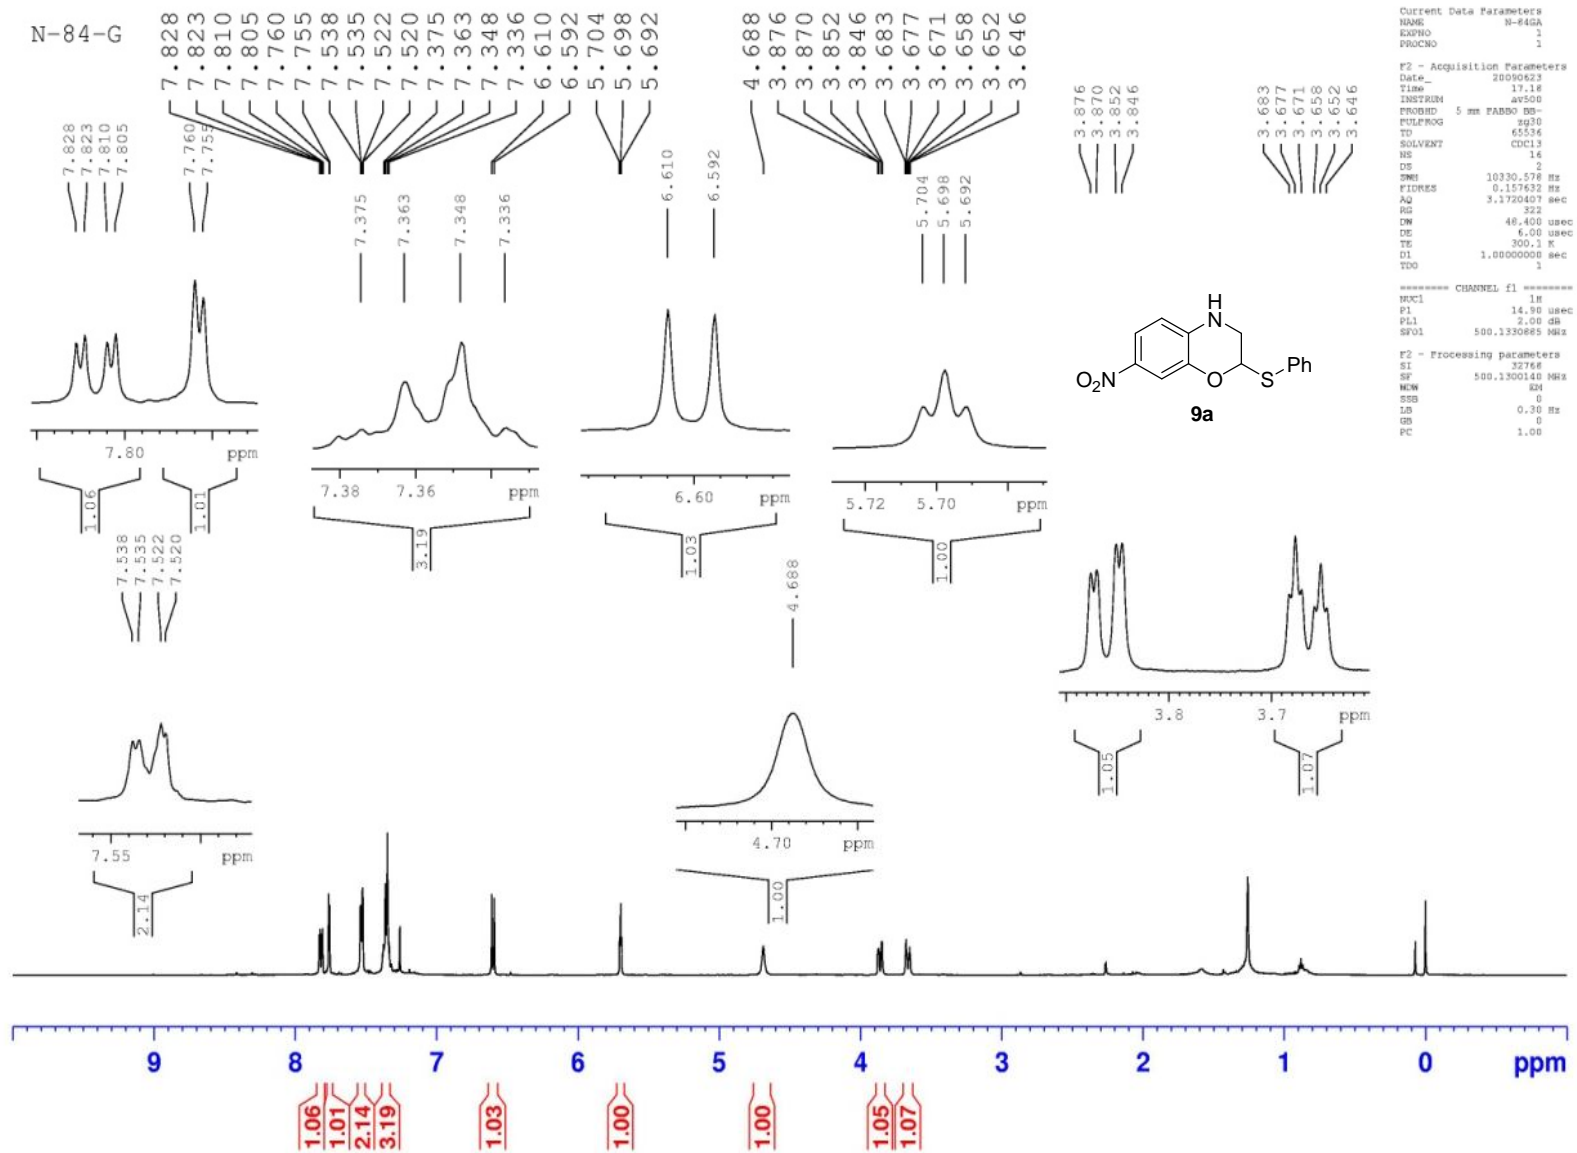

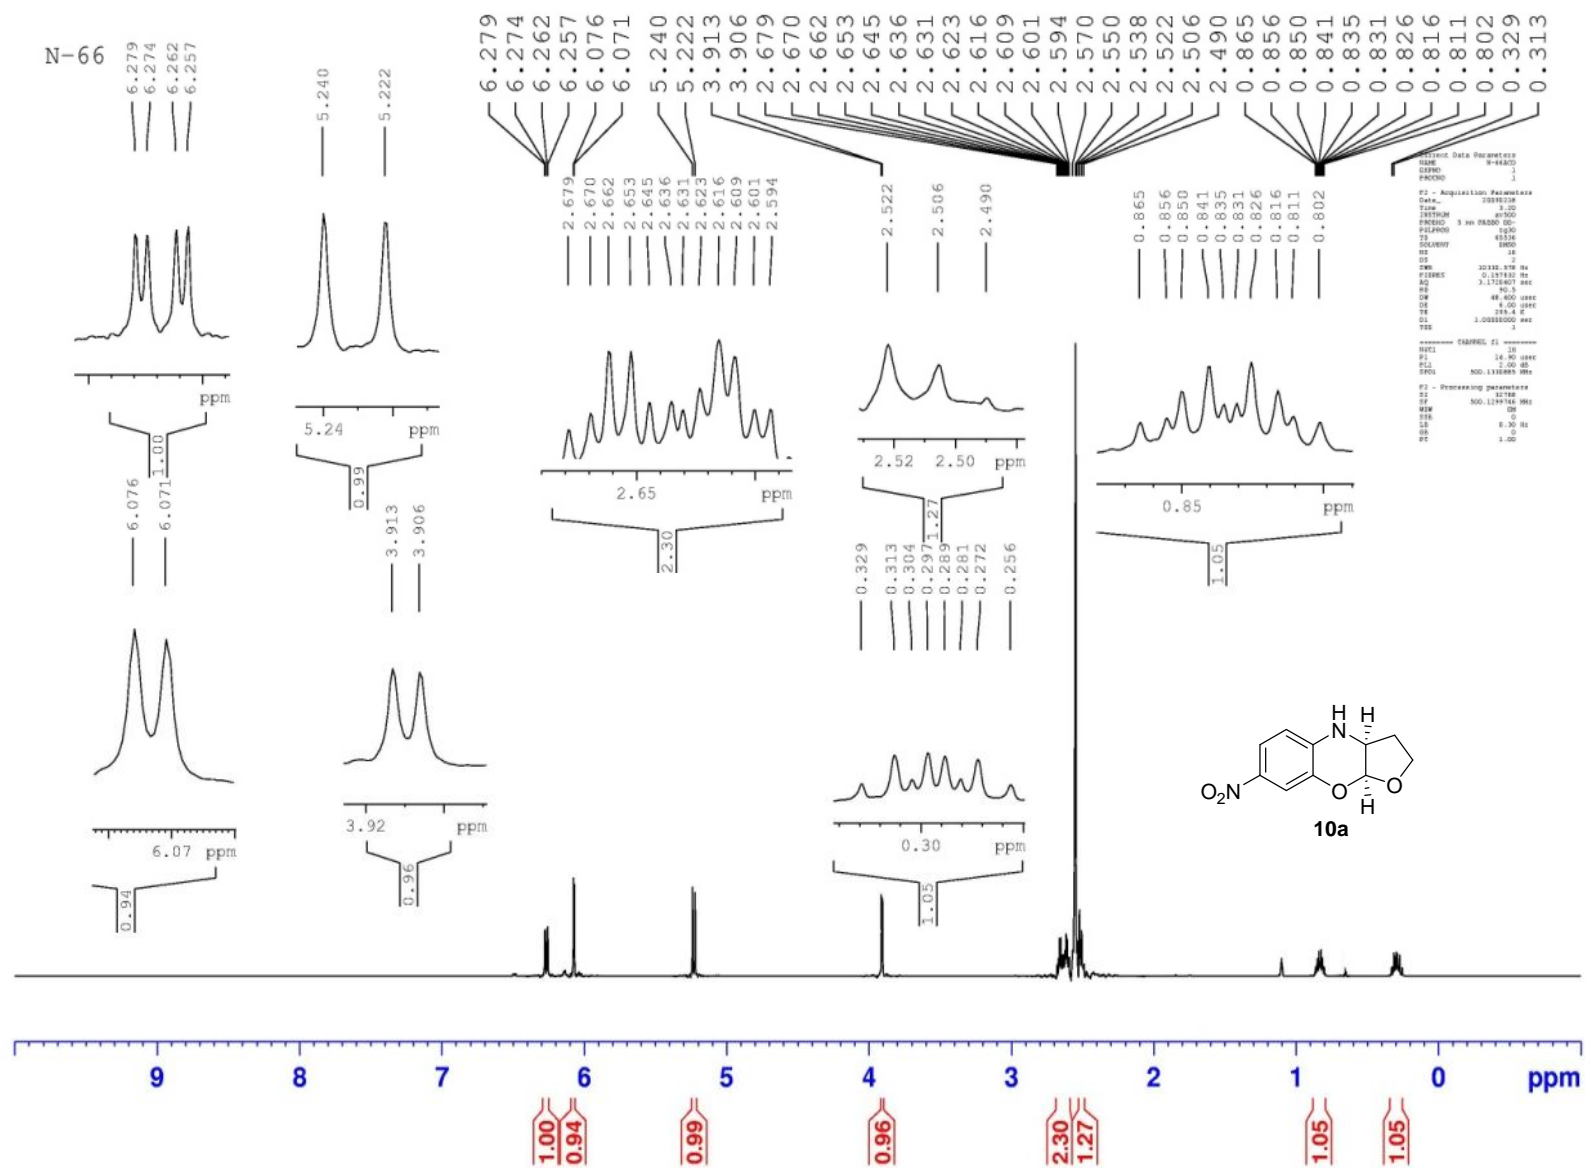

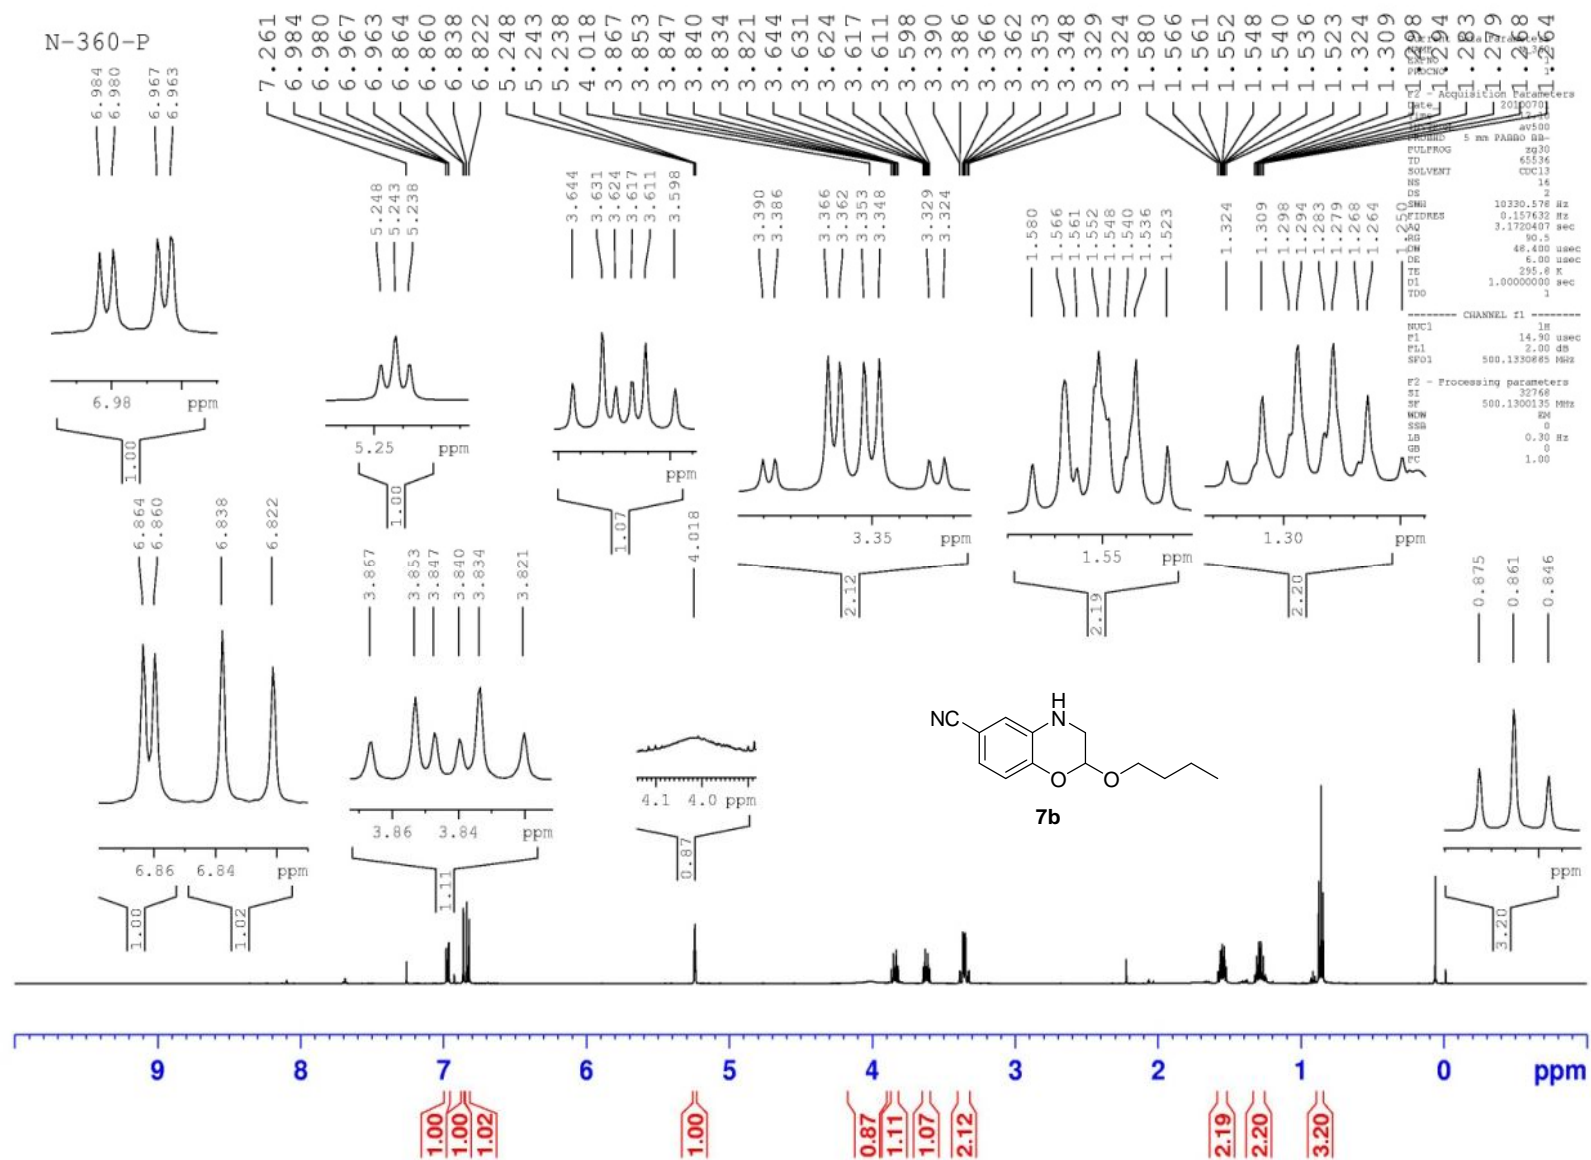



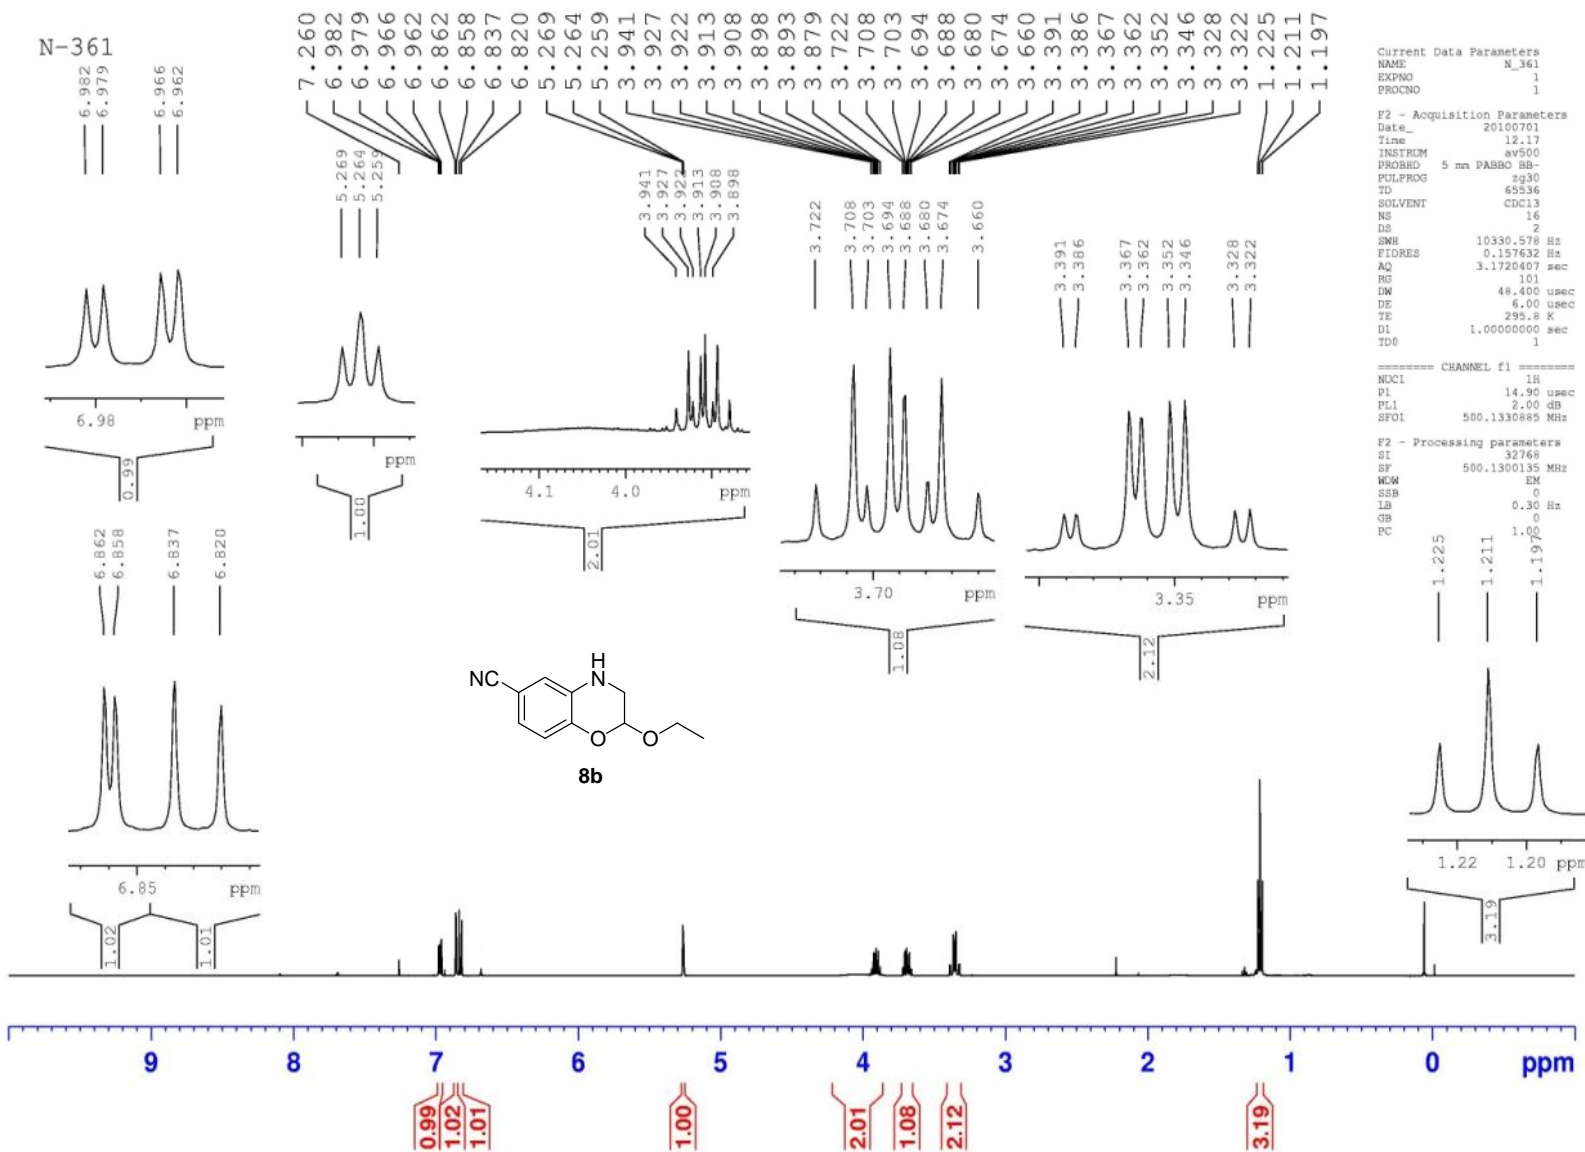

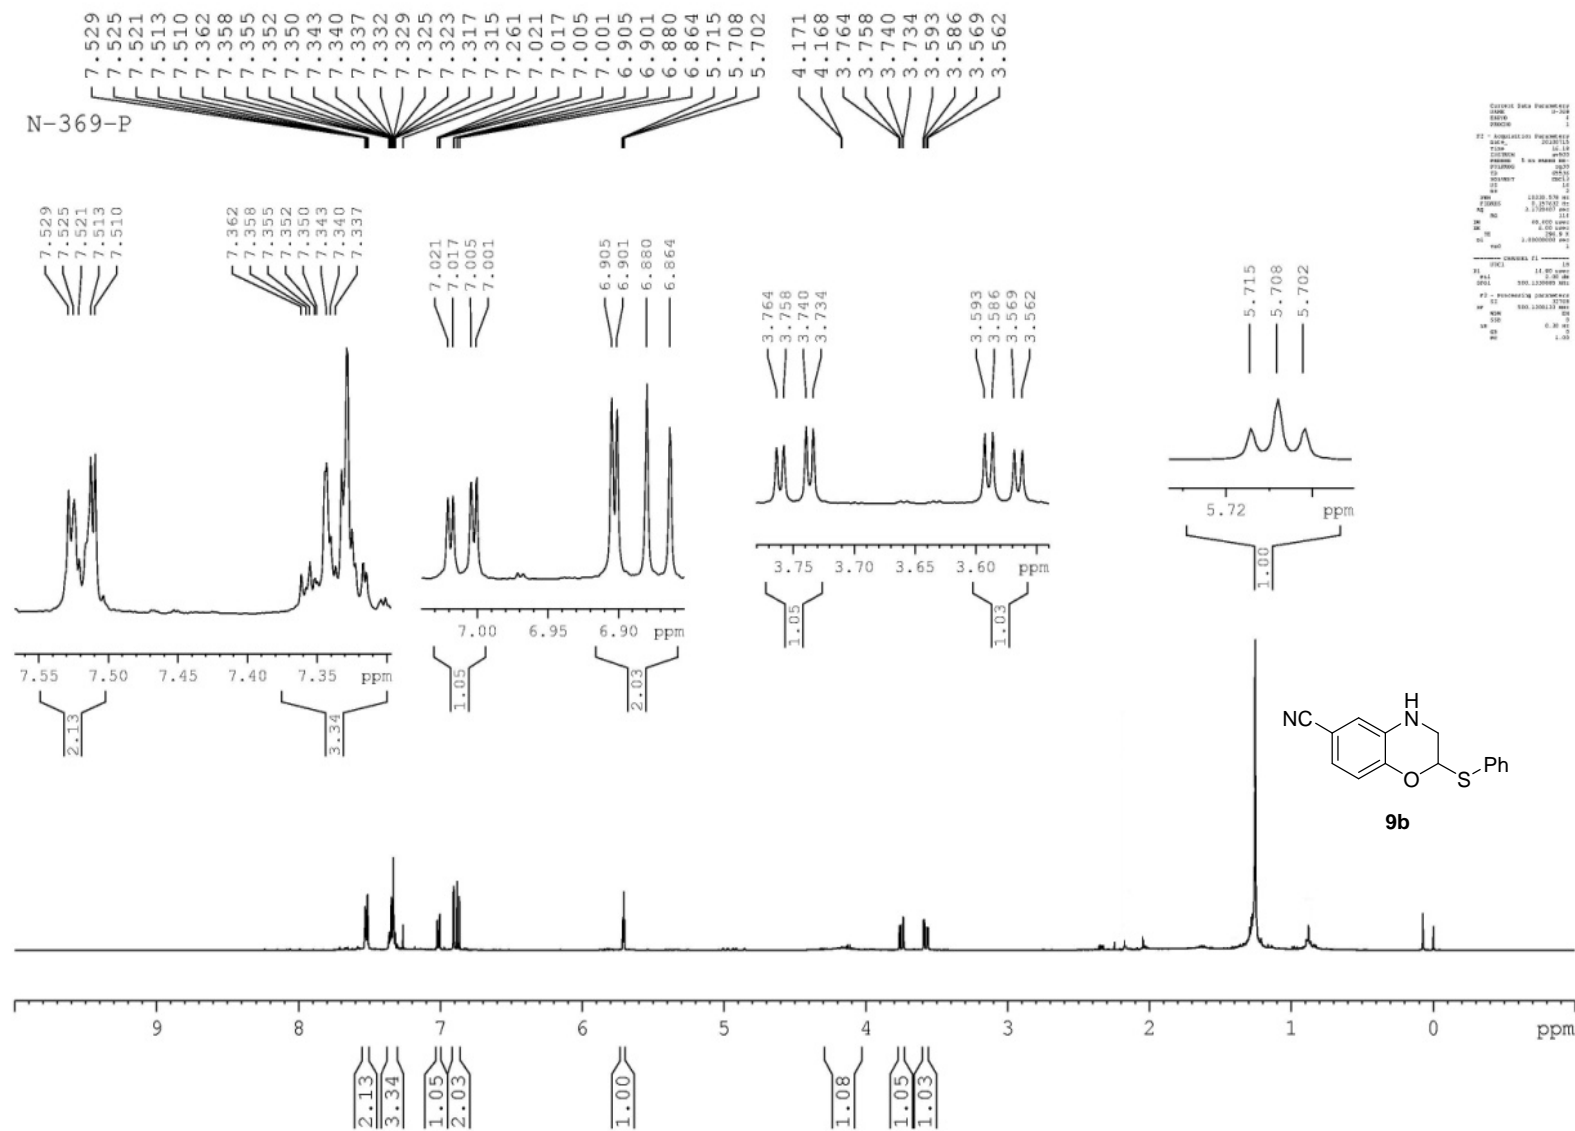



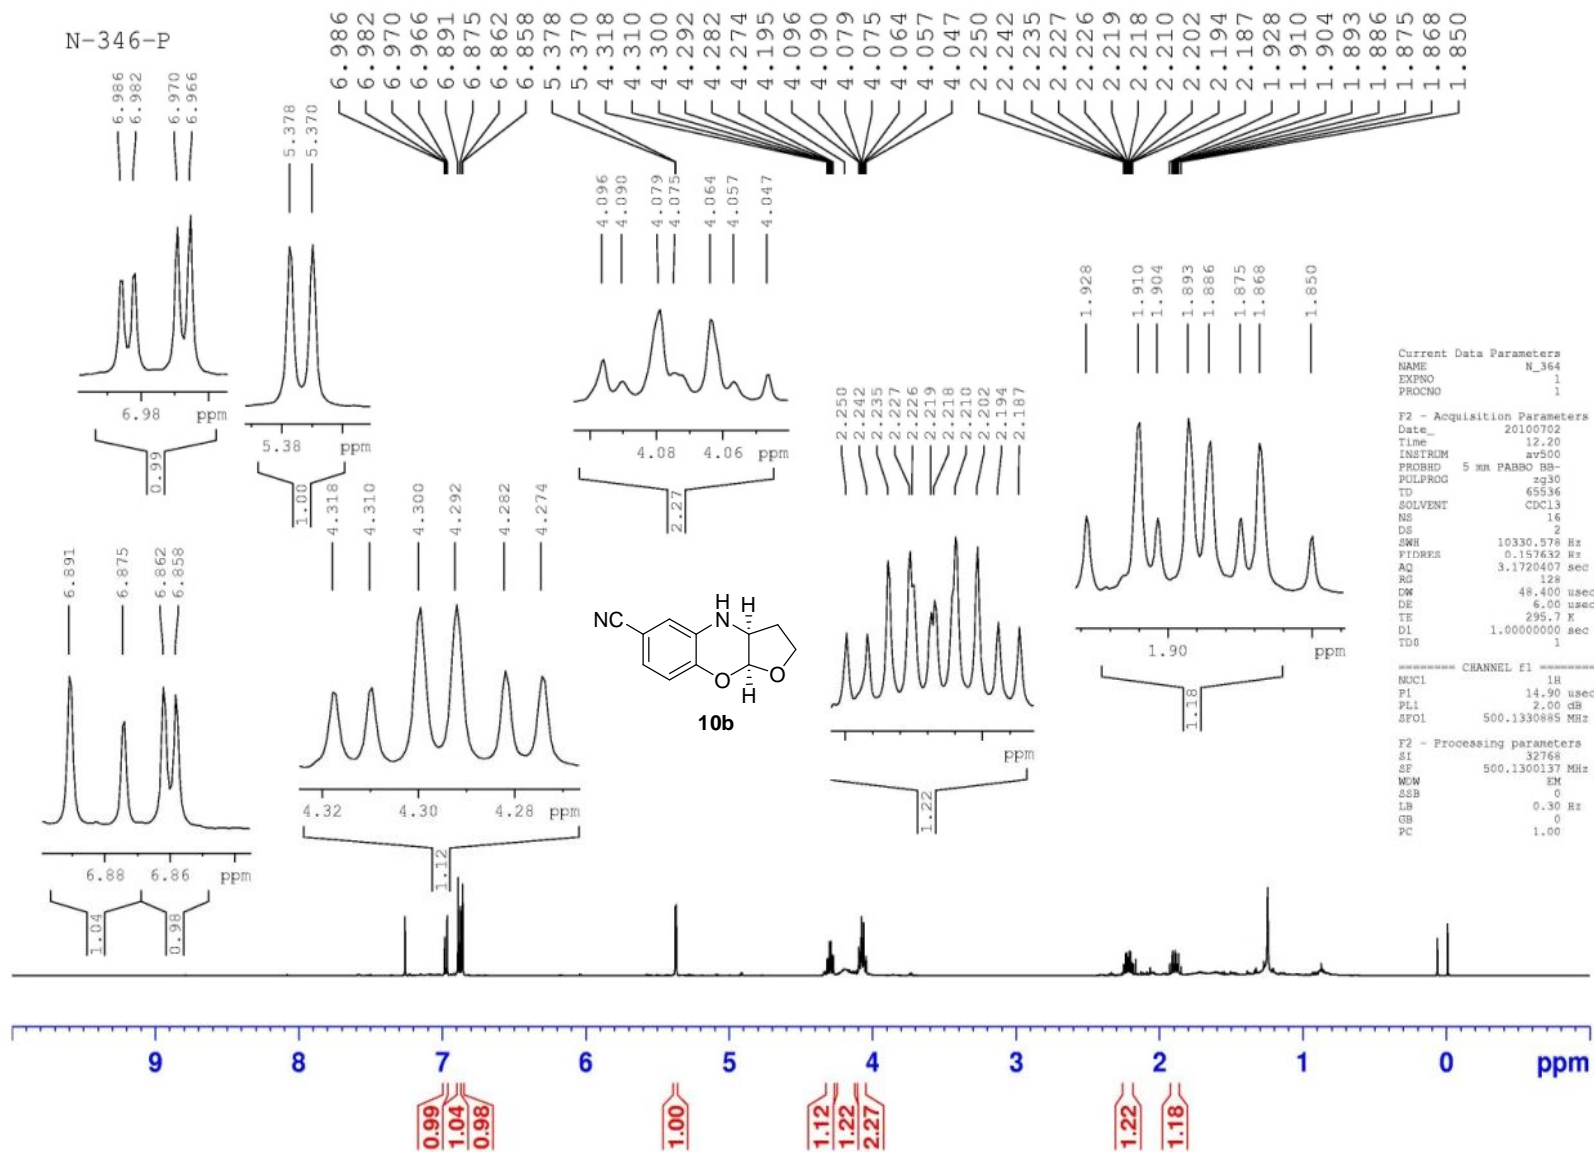

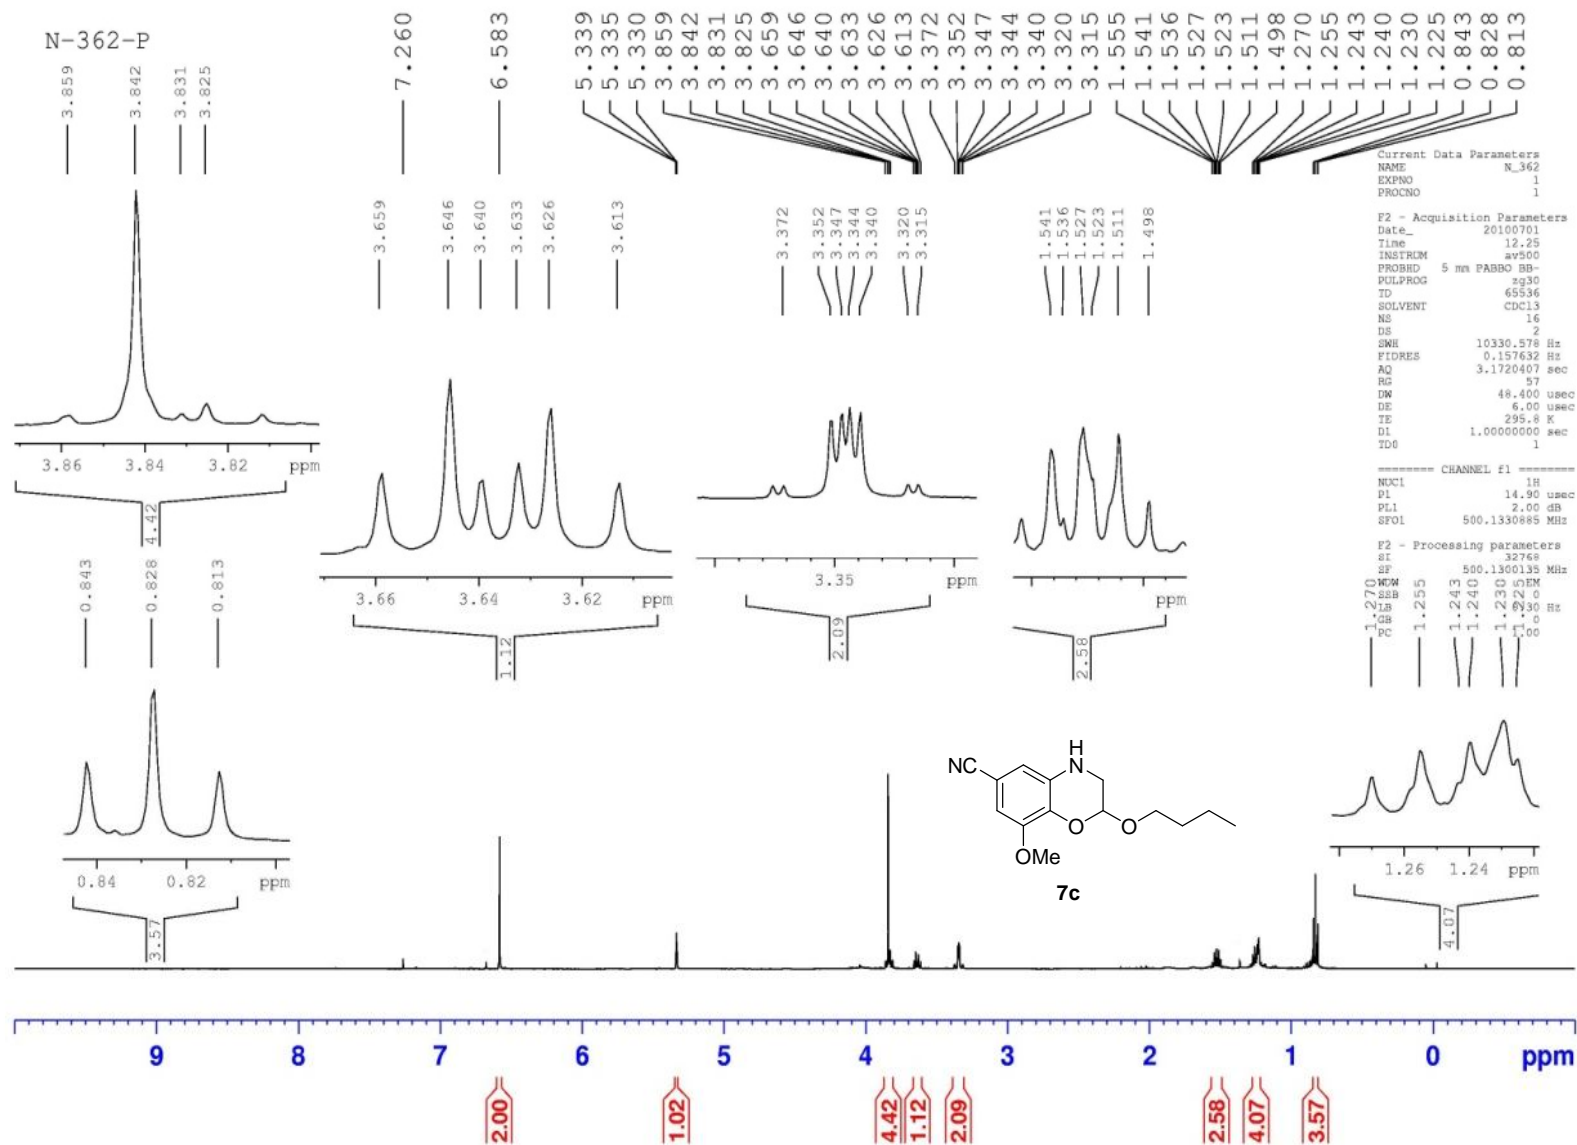

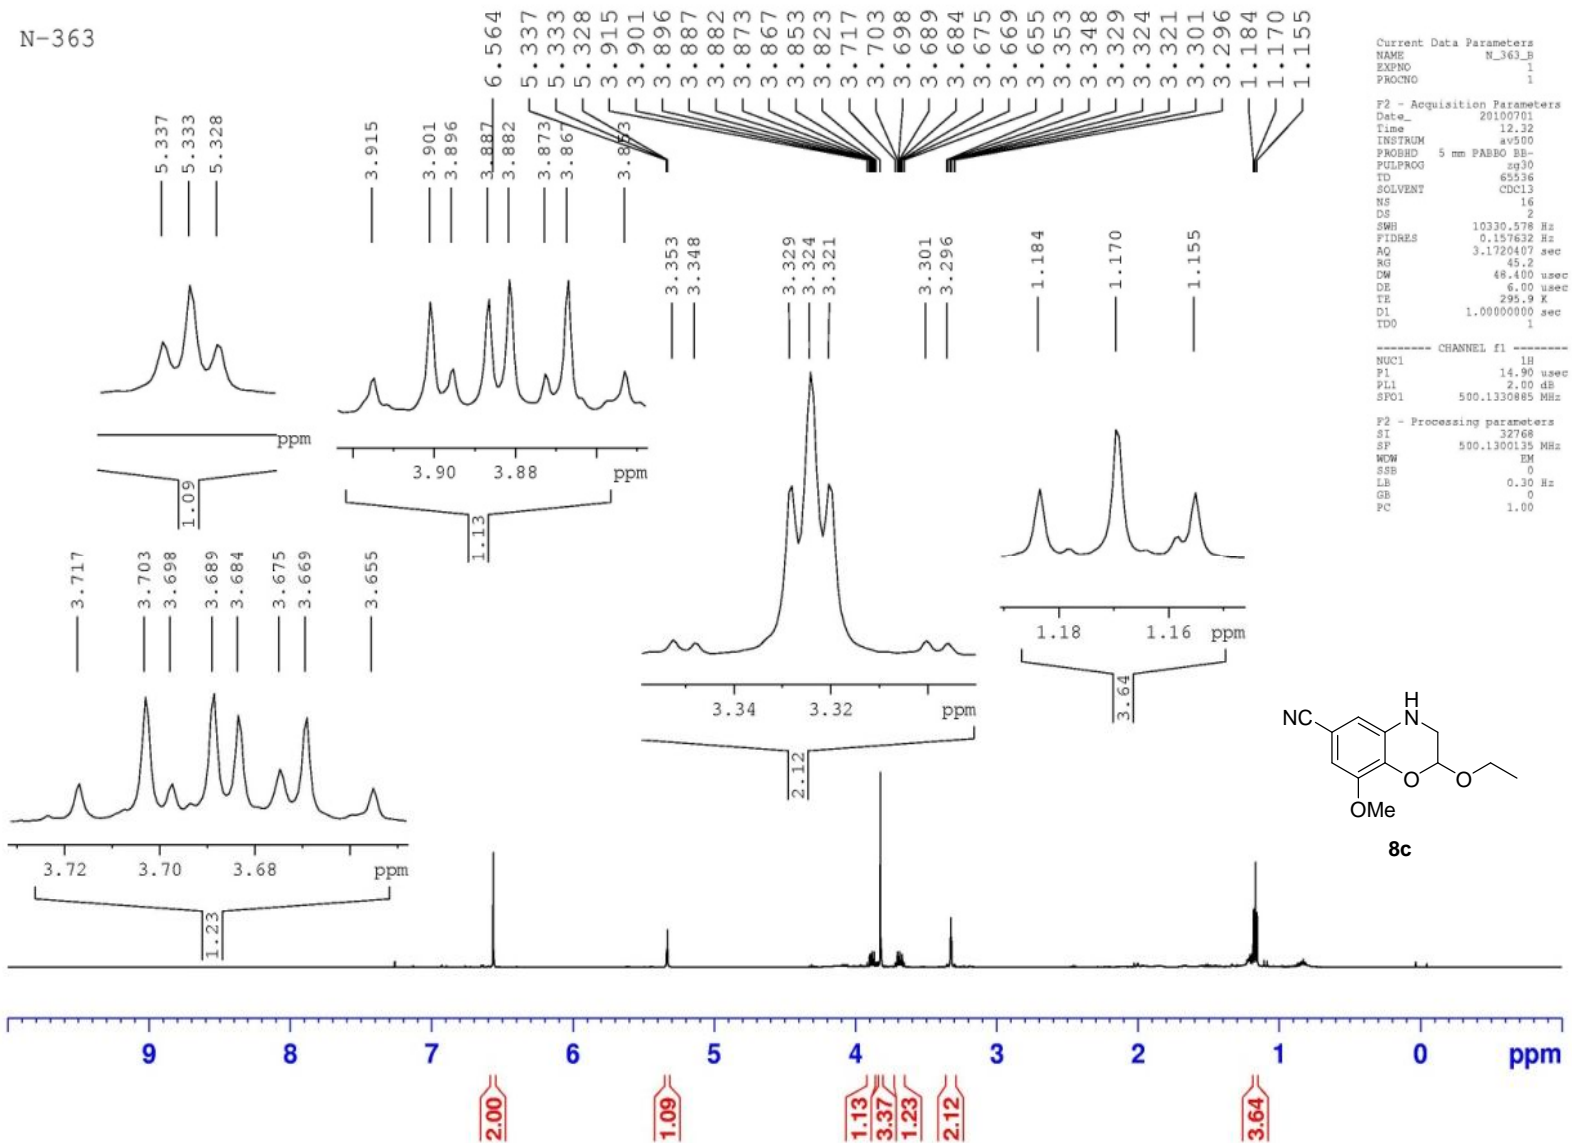

N-445

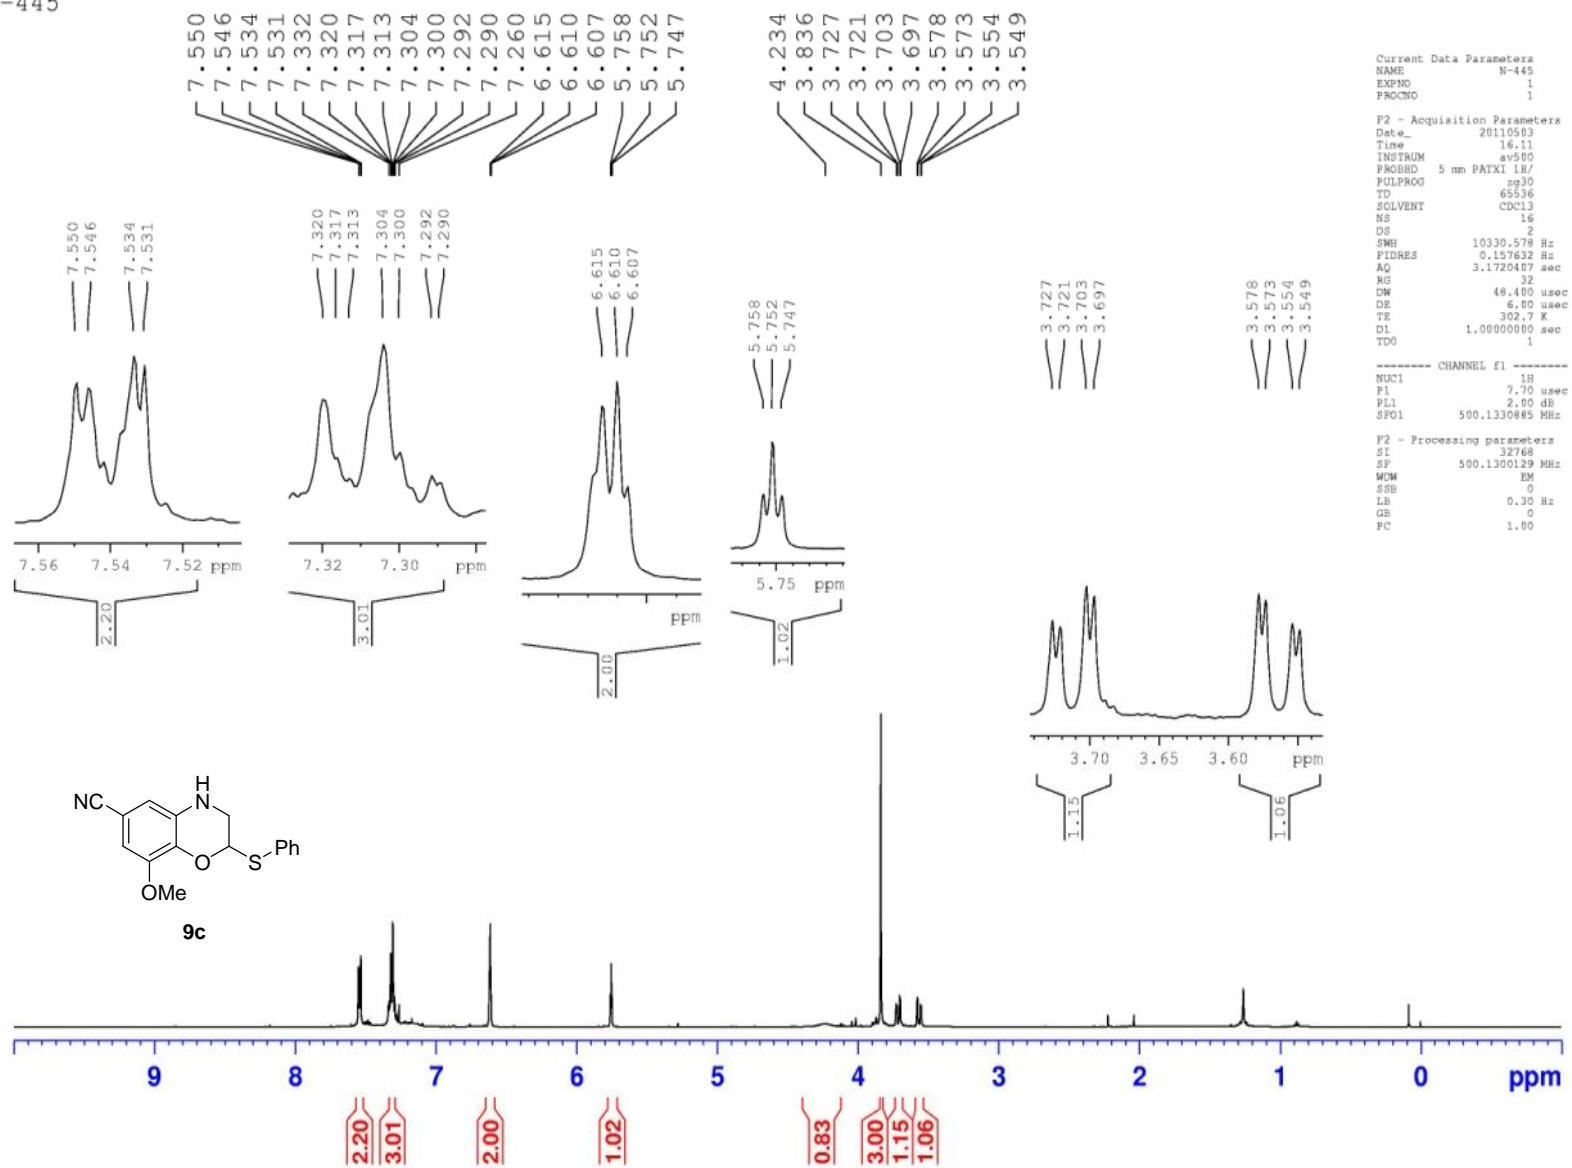

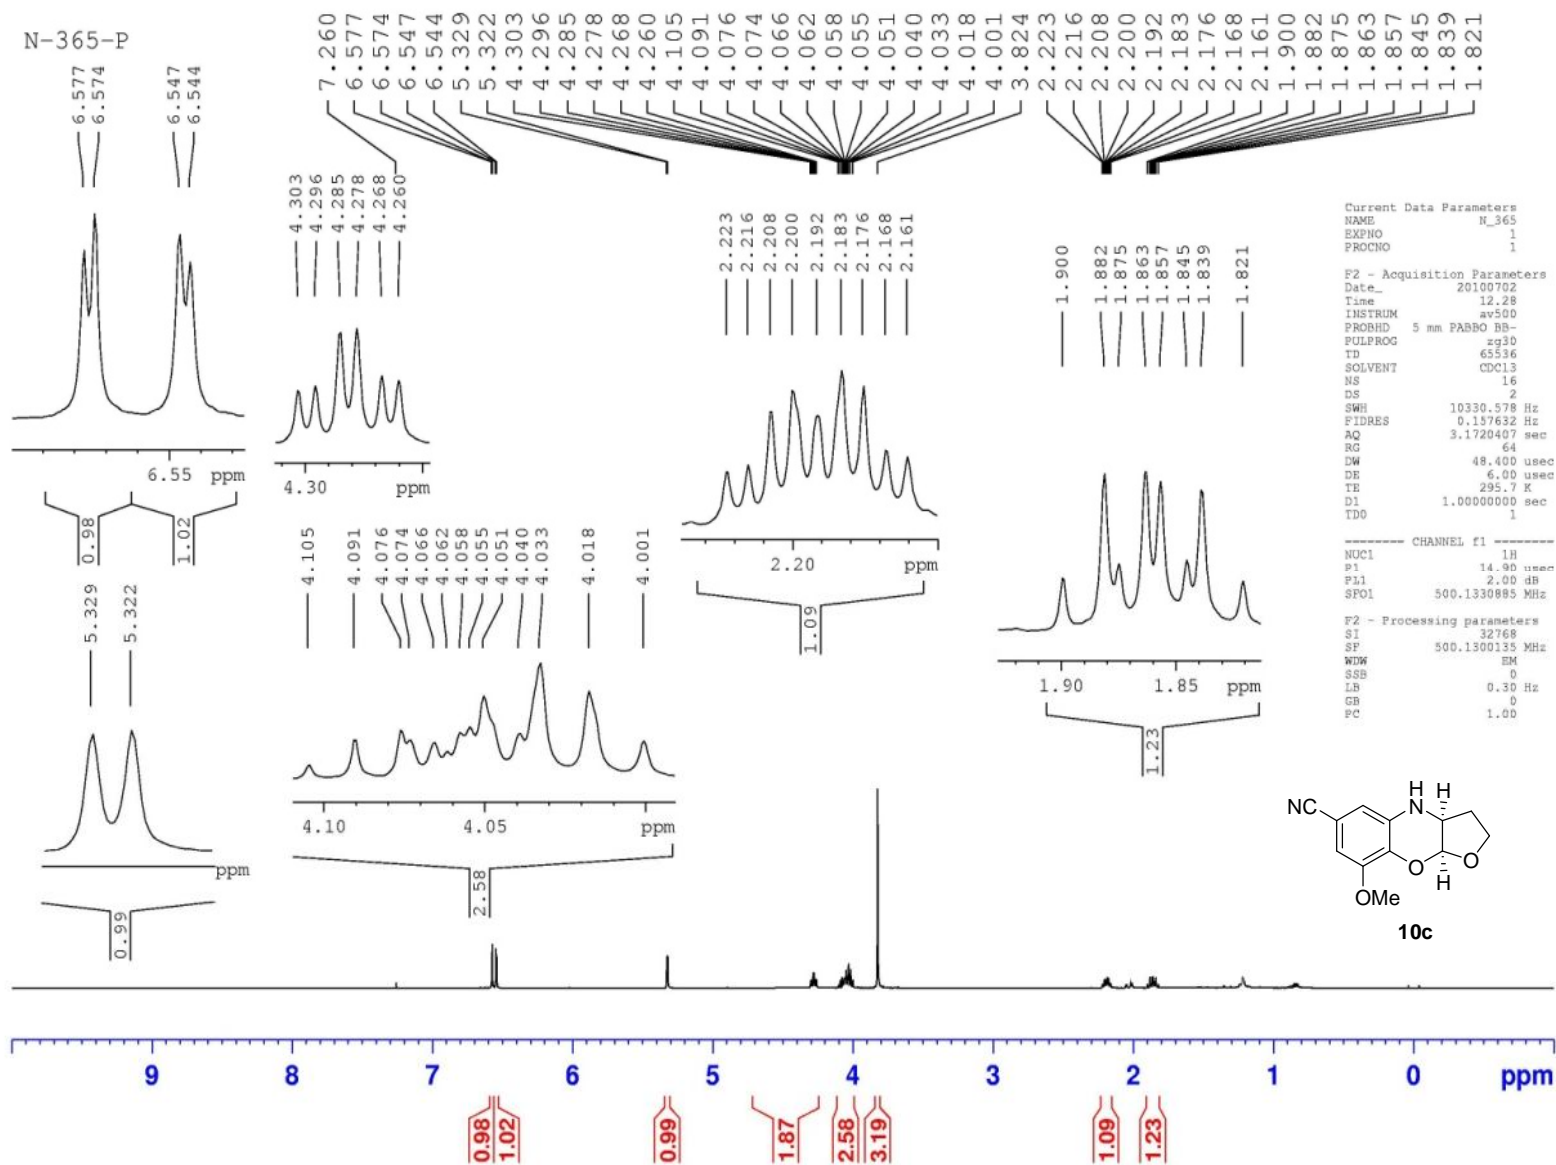



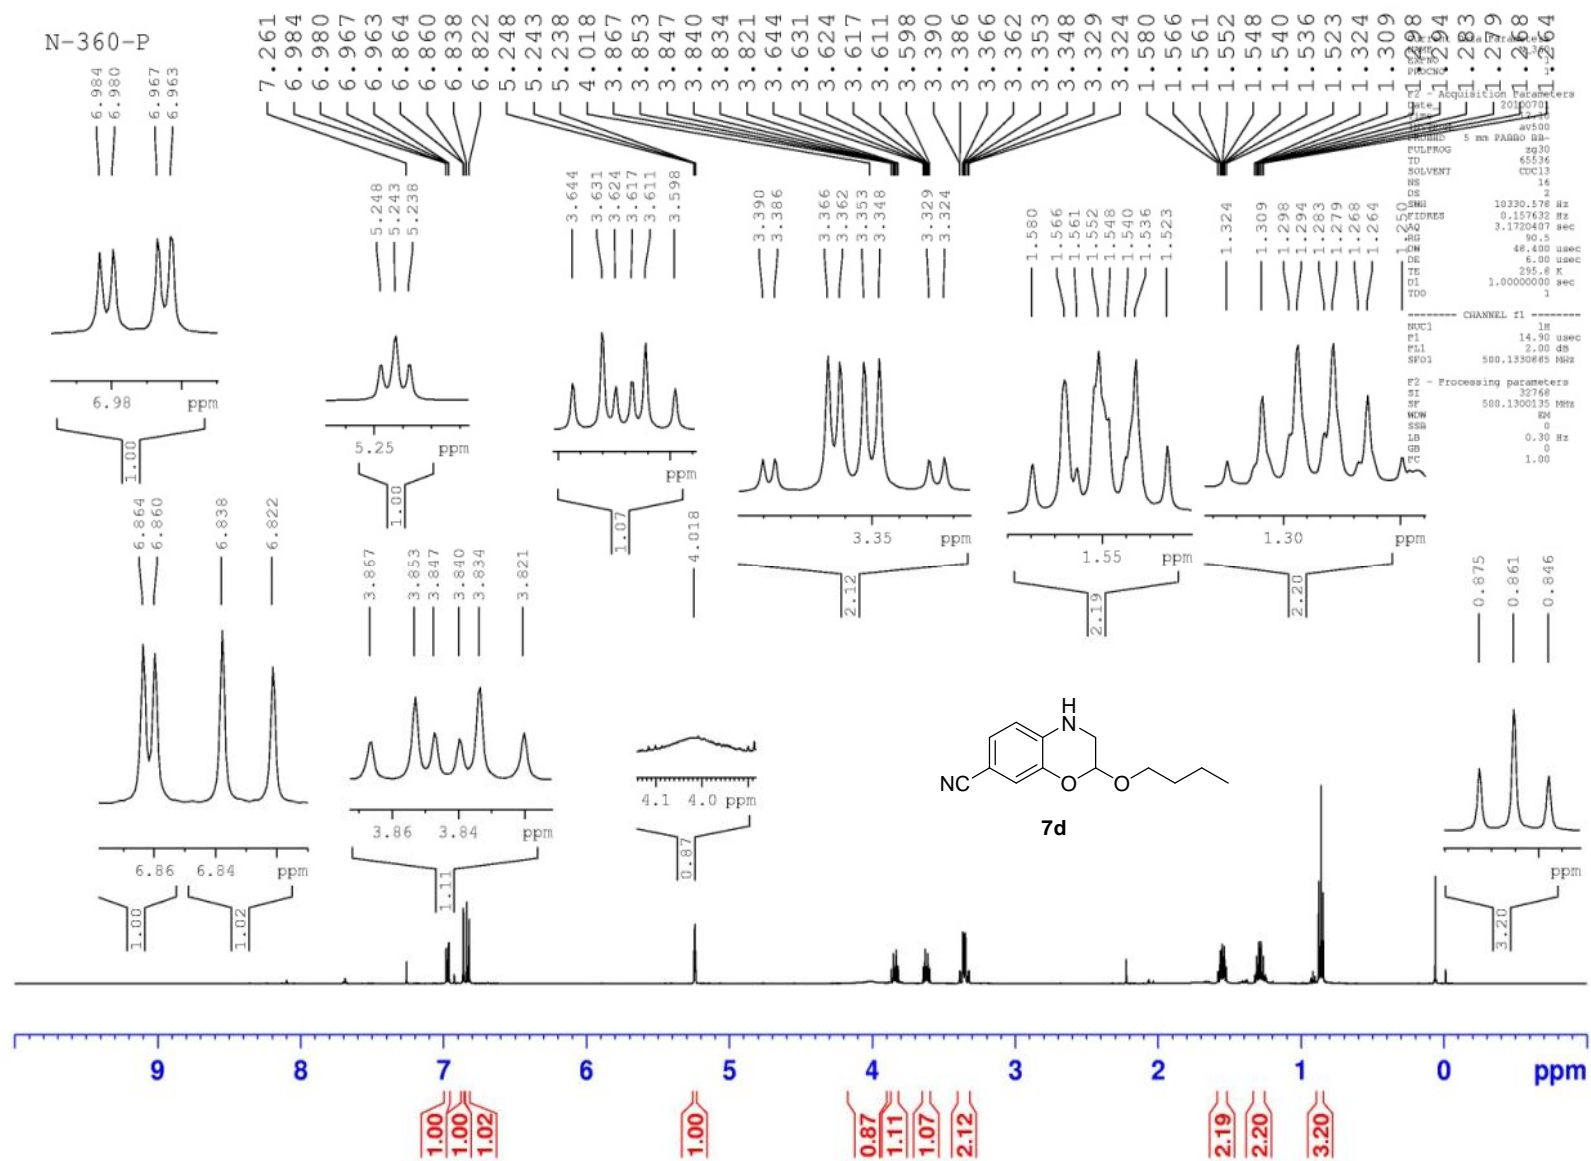



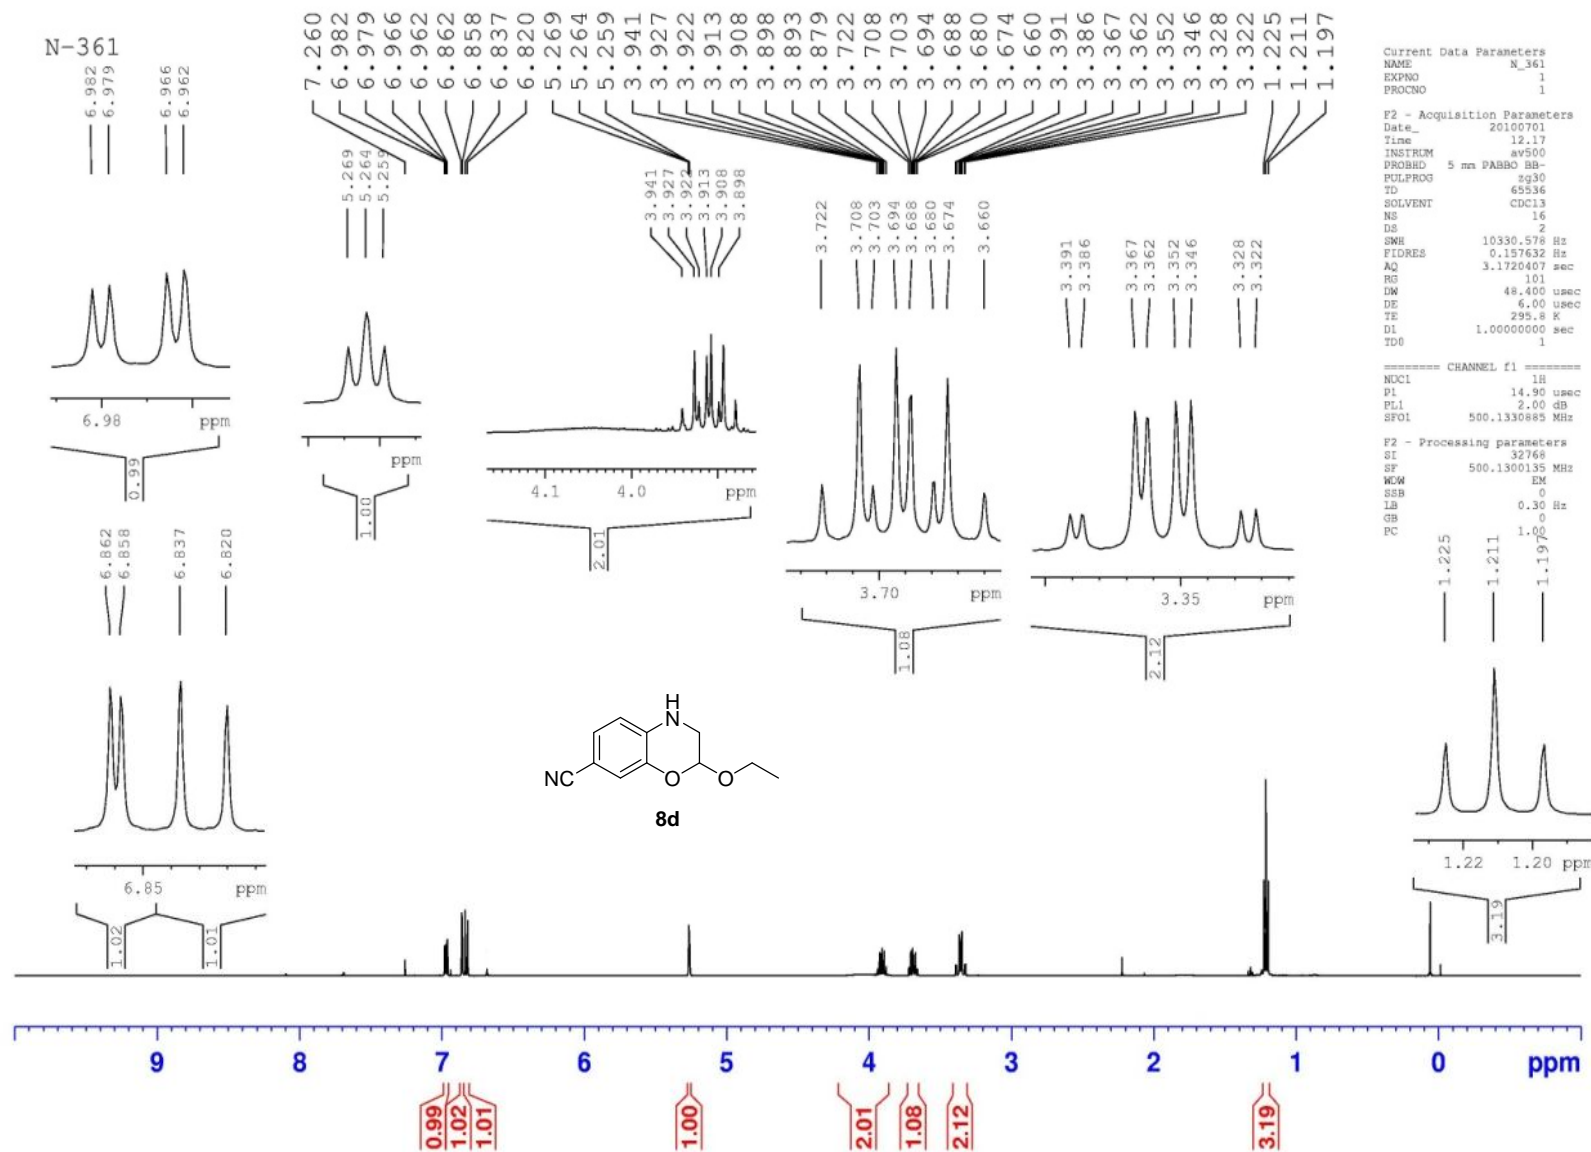

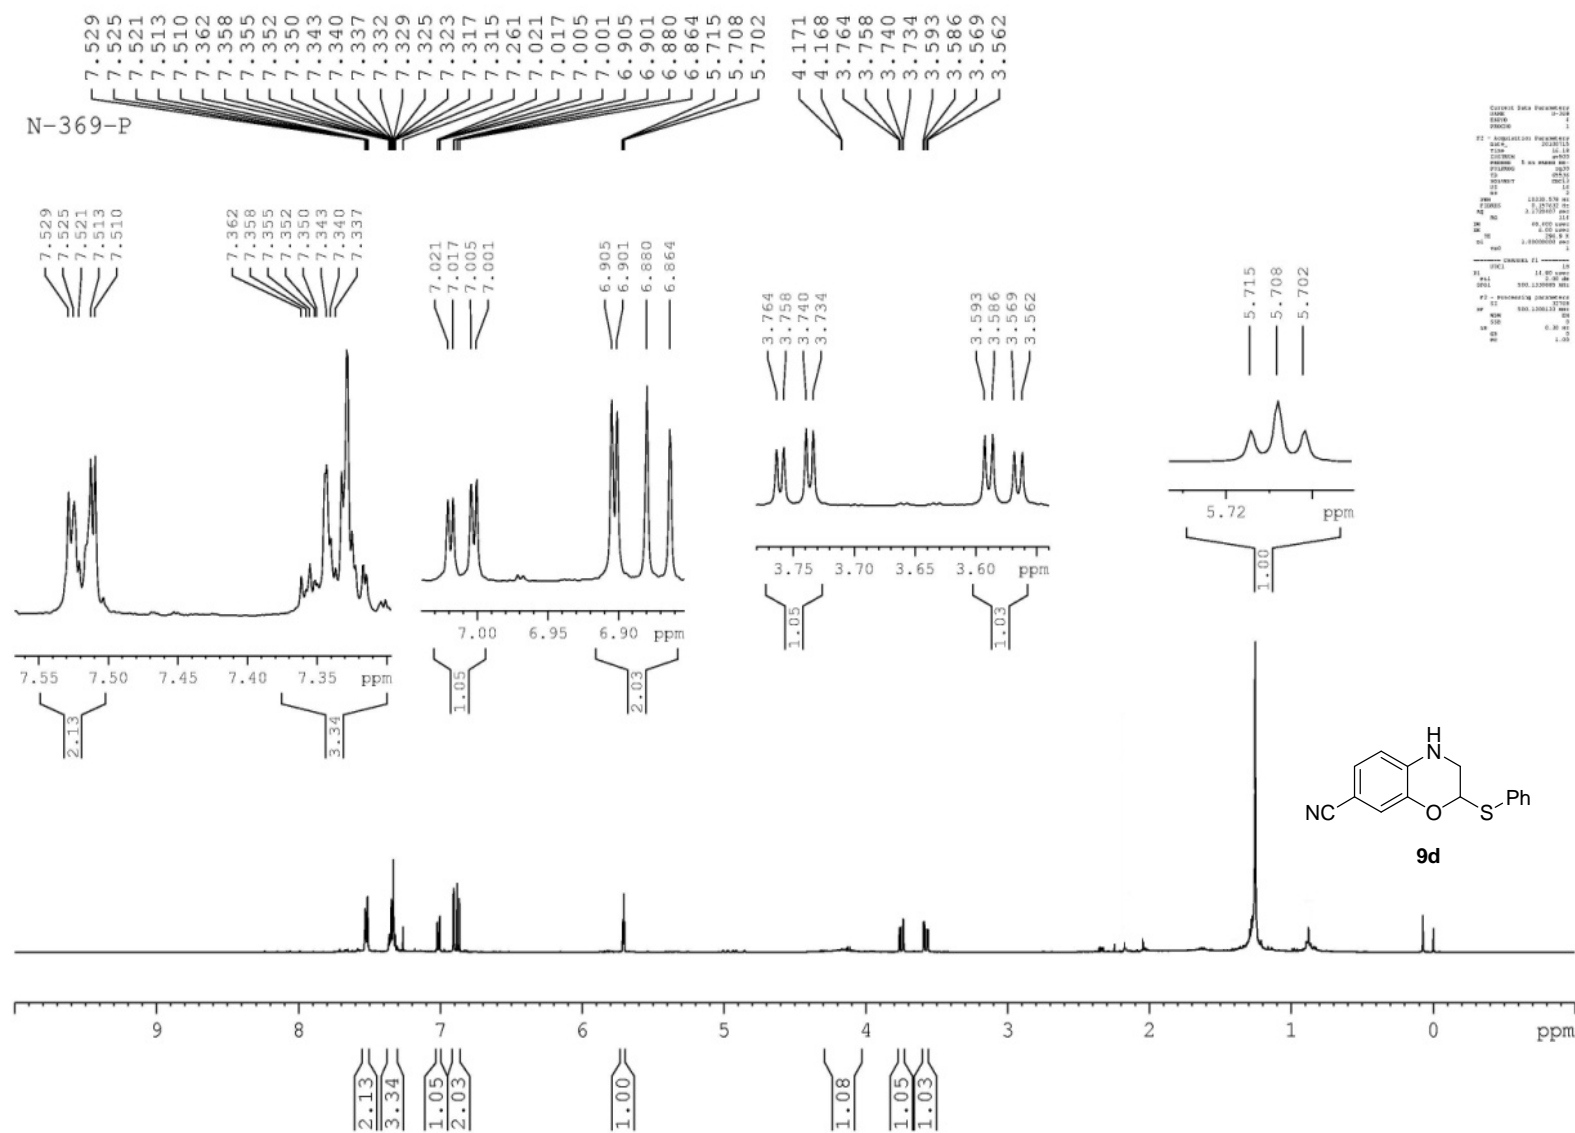

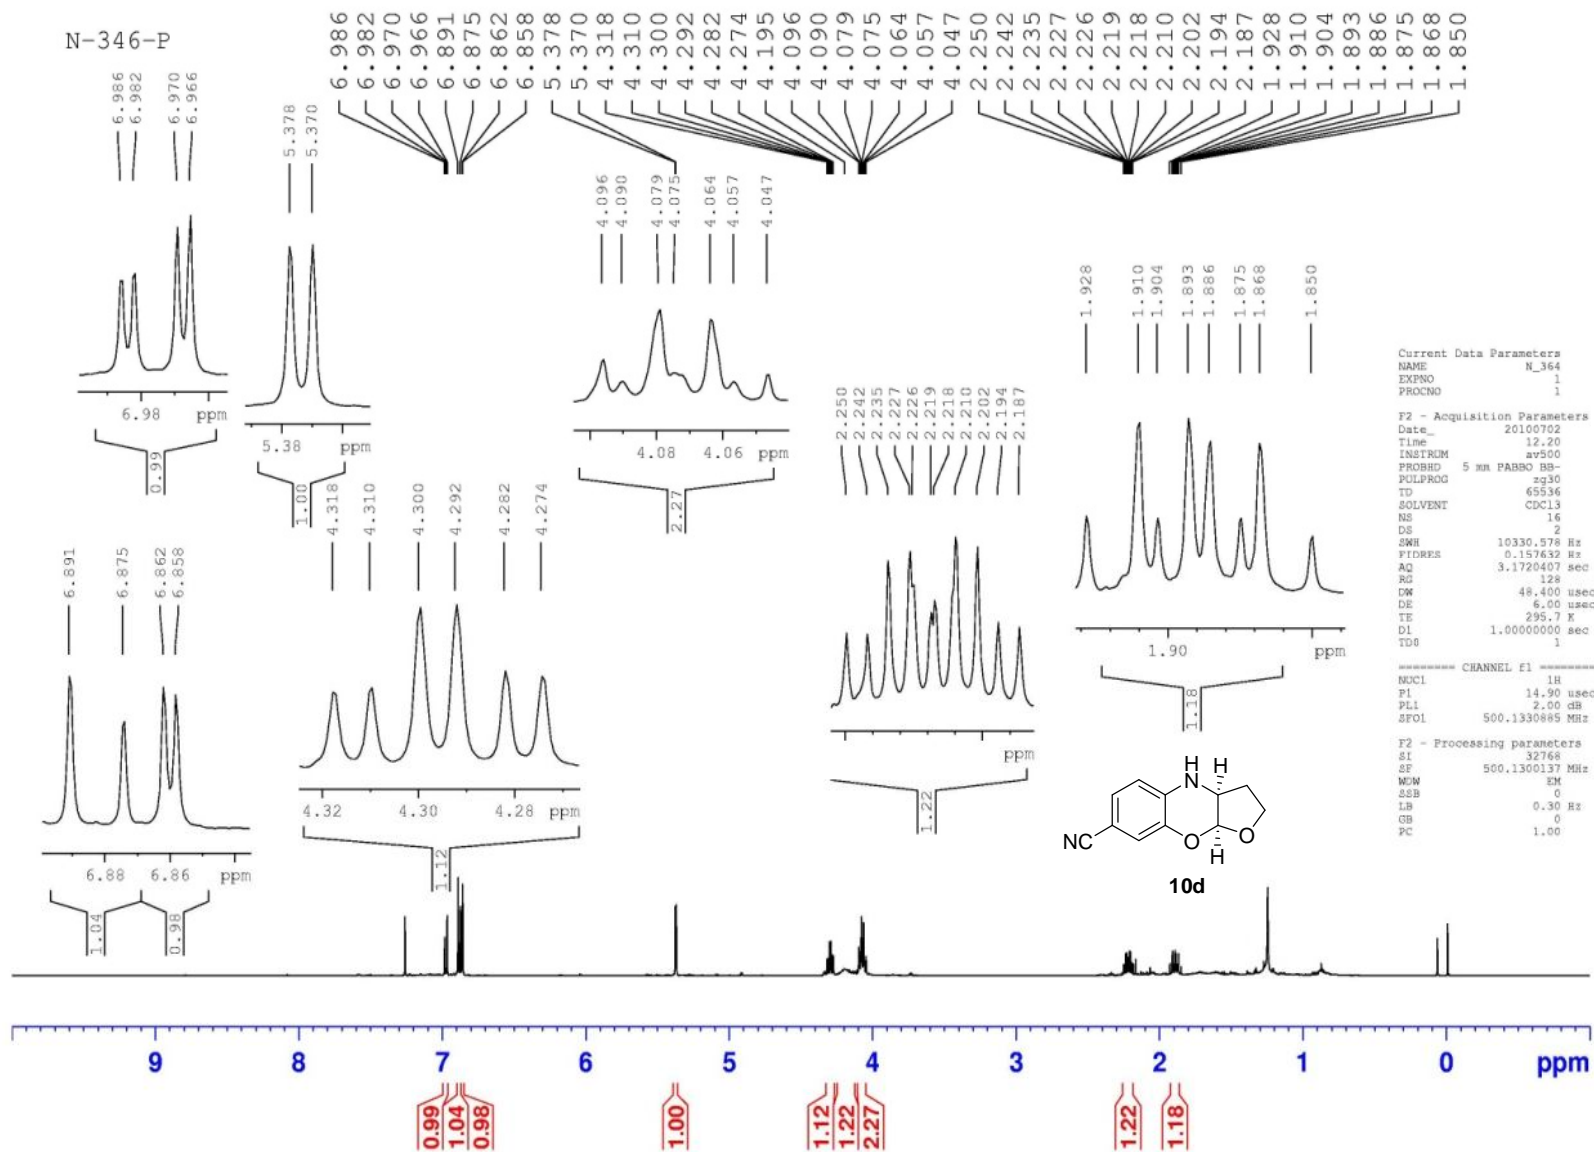

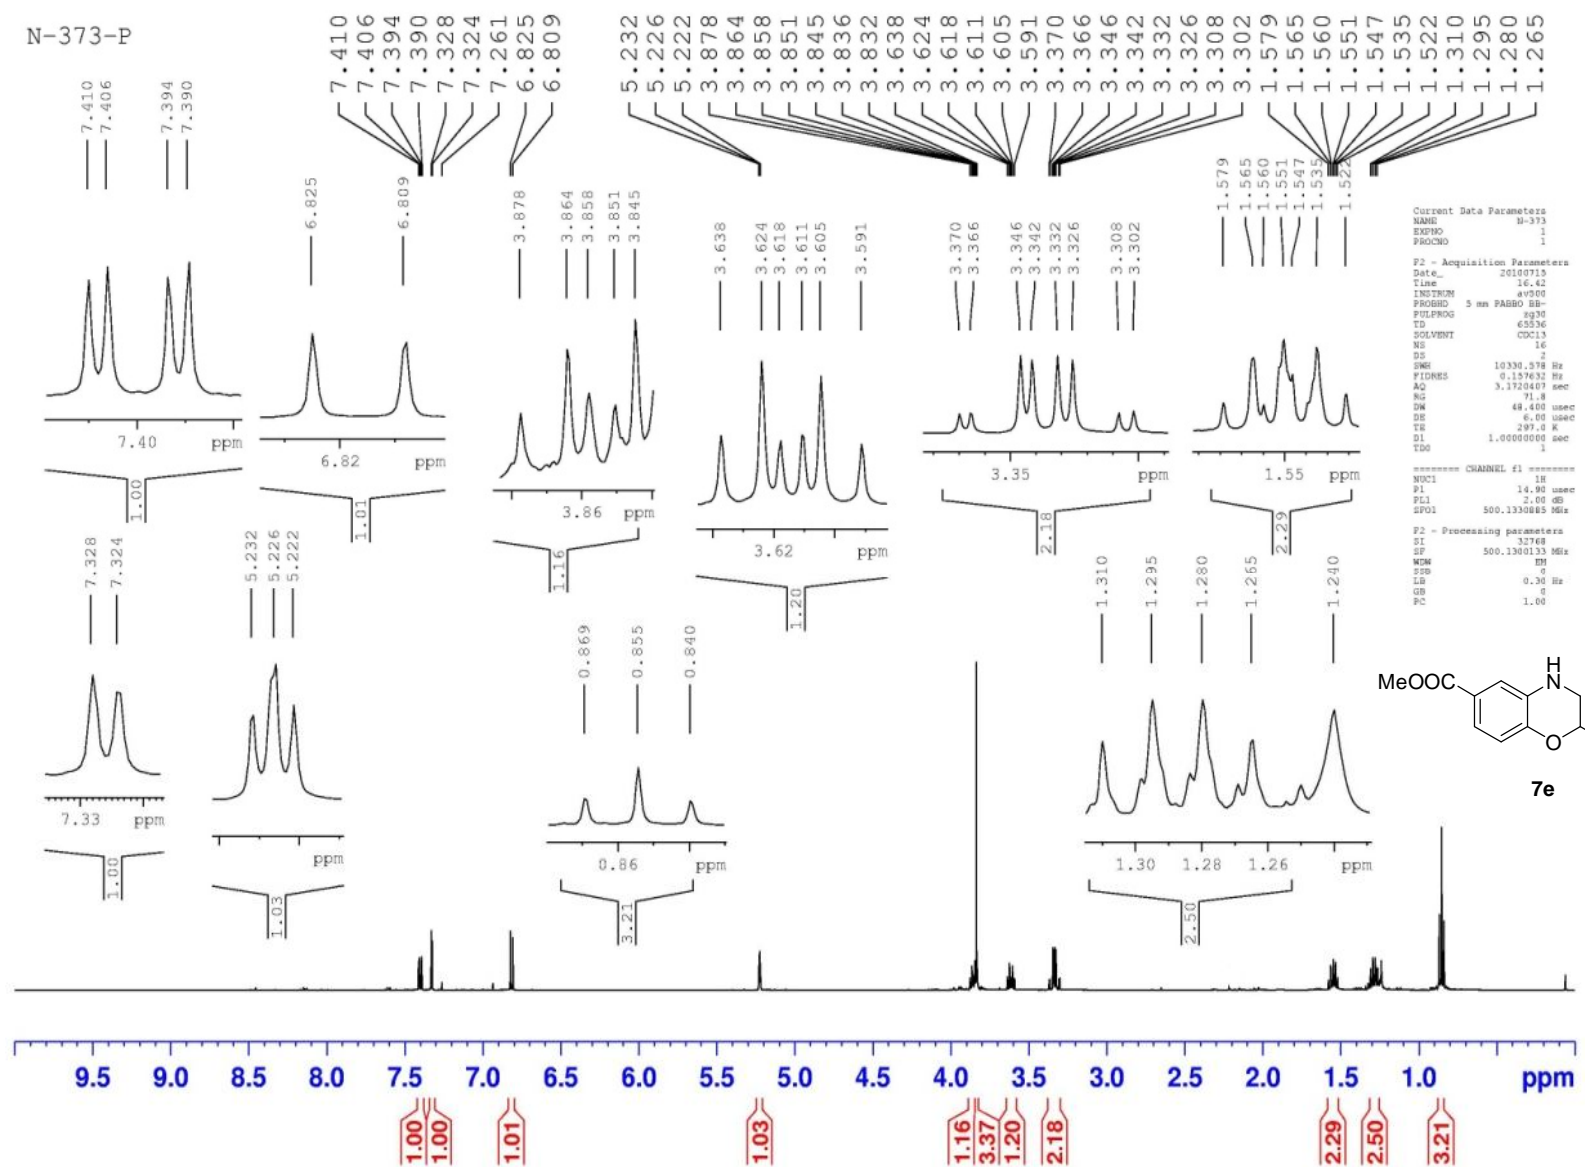

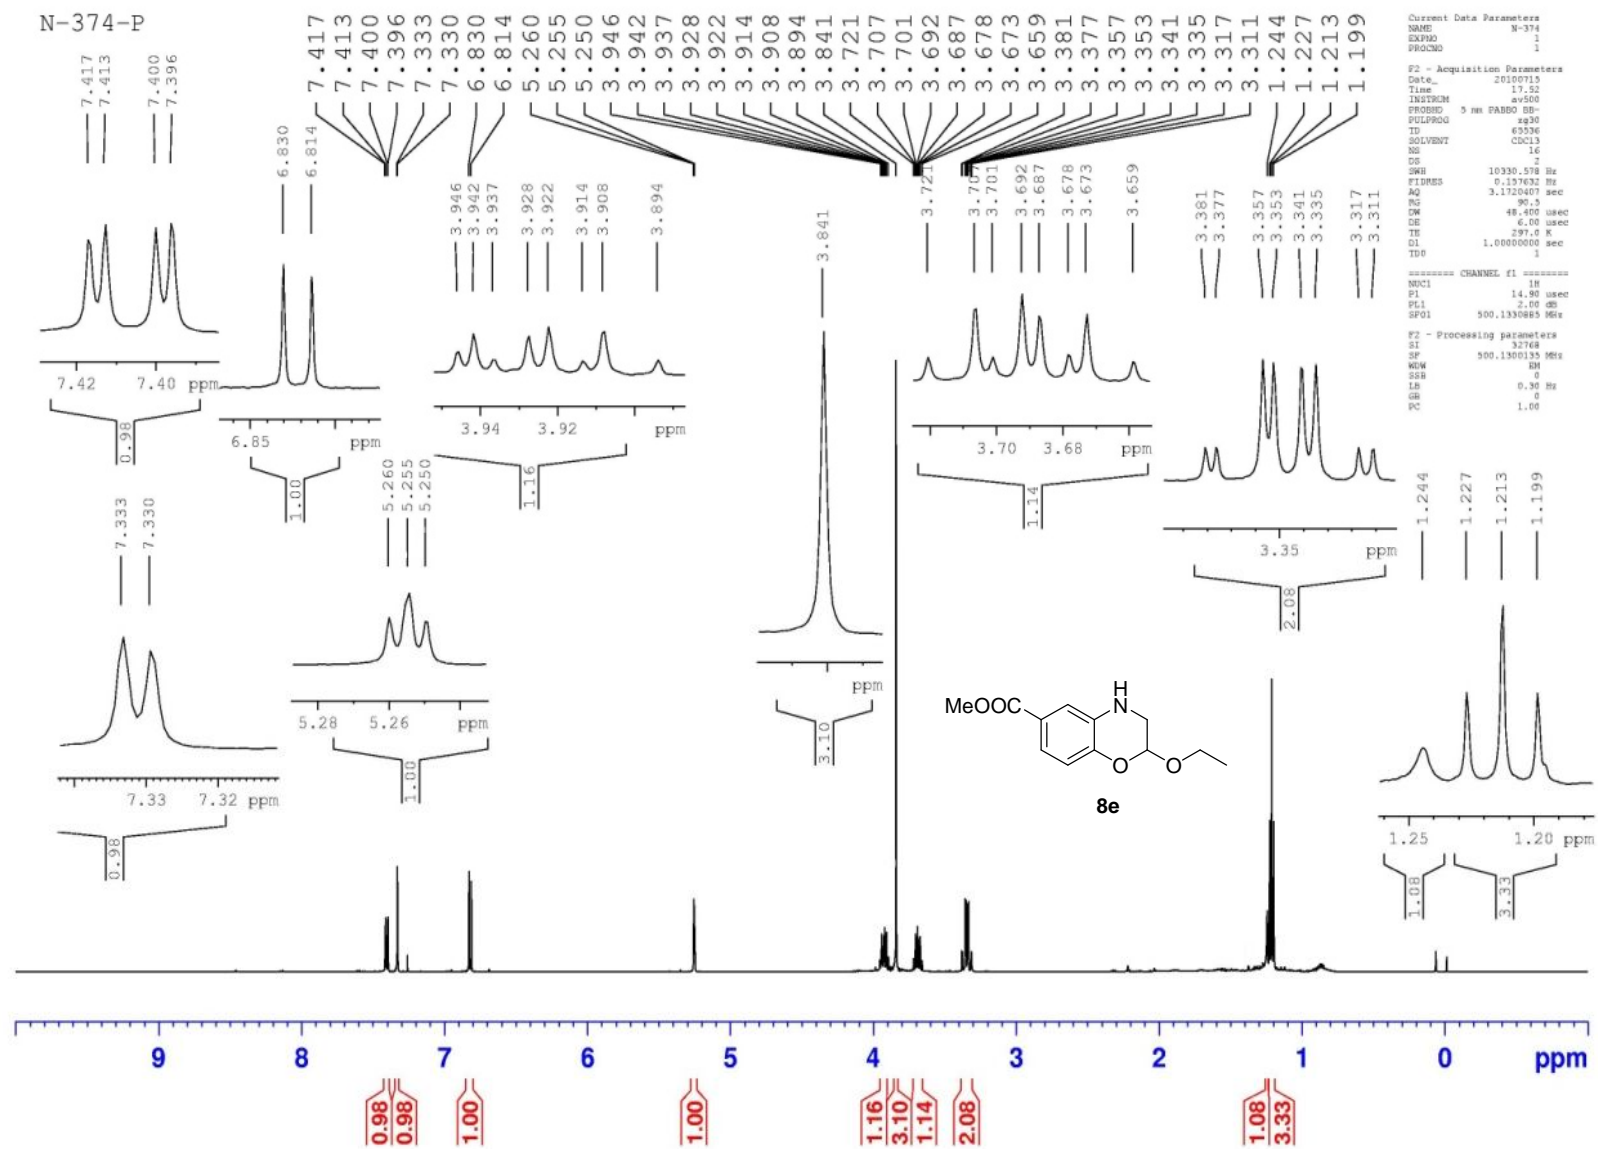



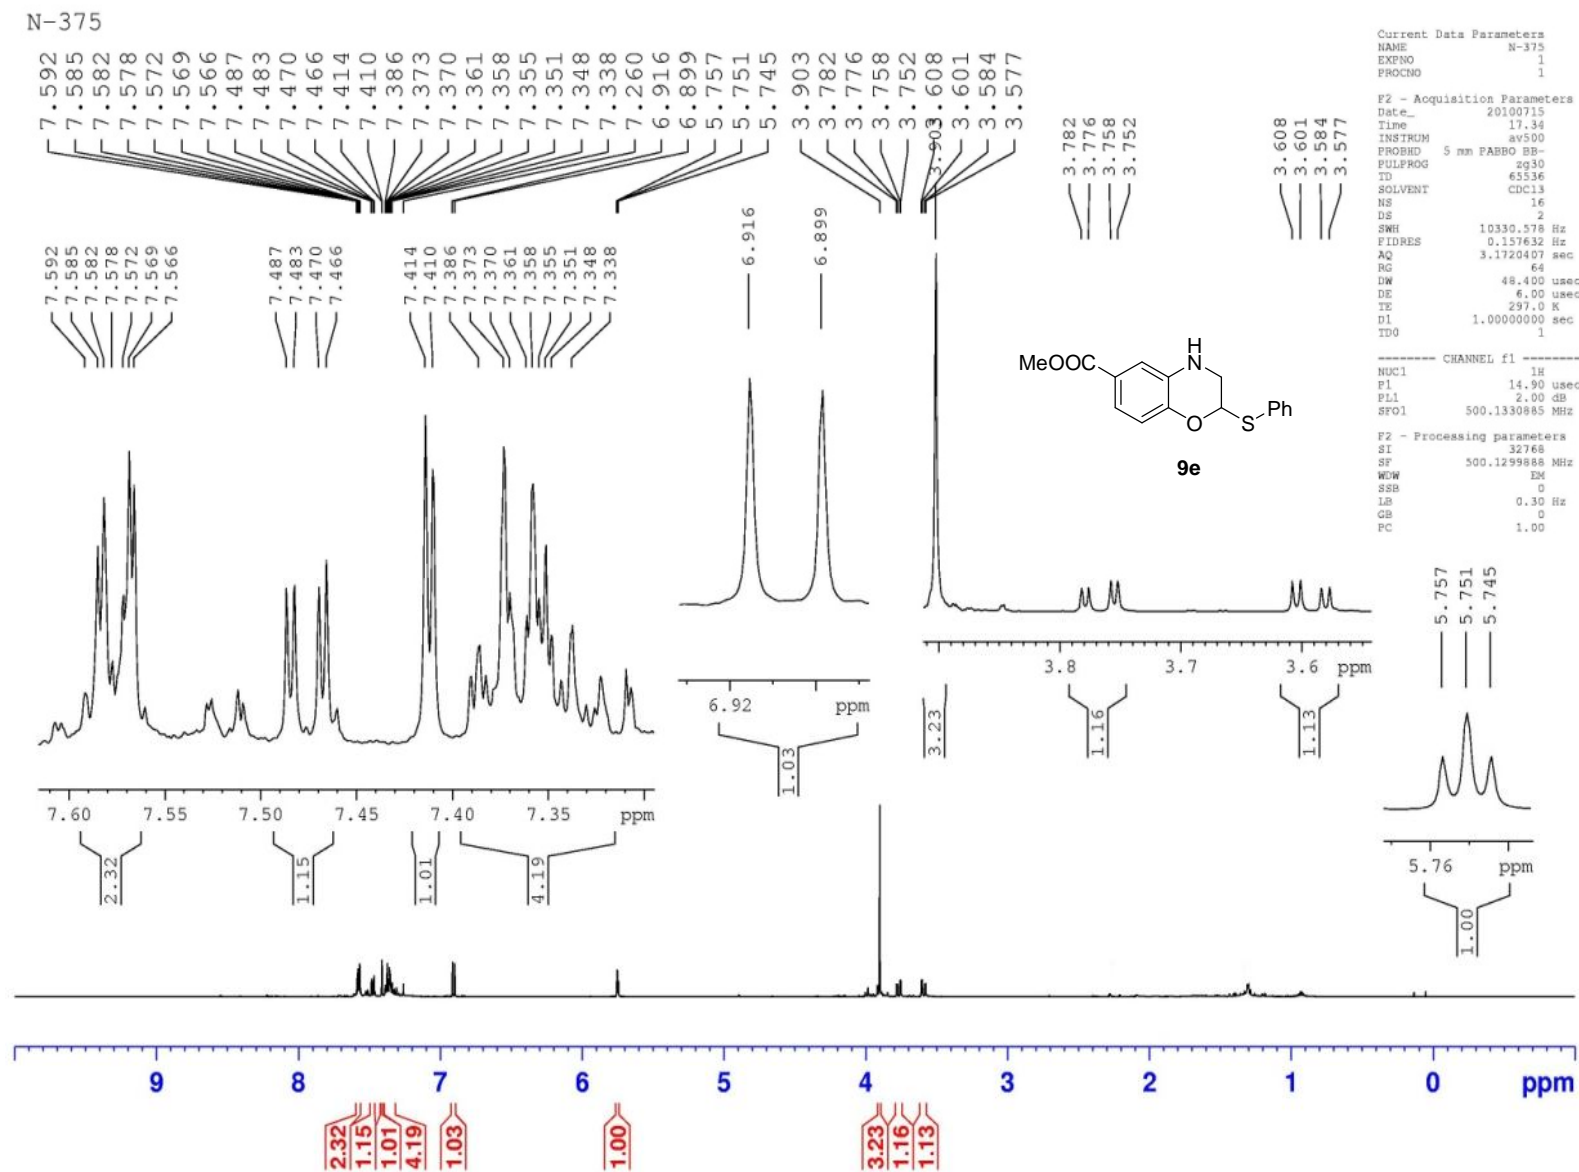



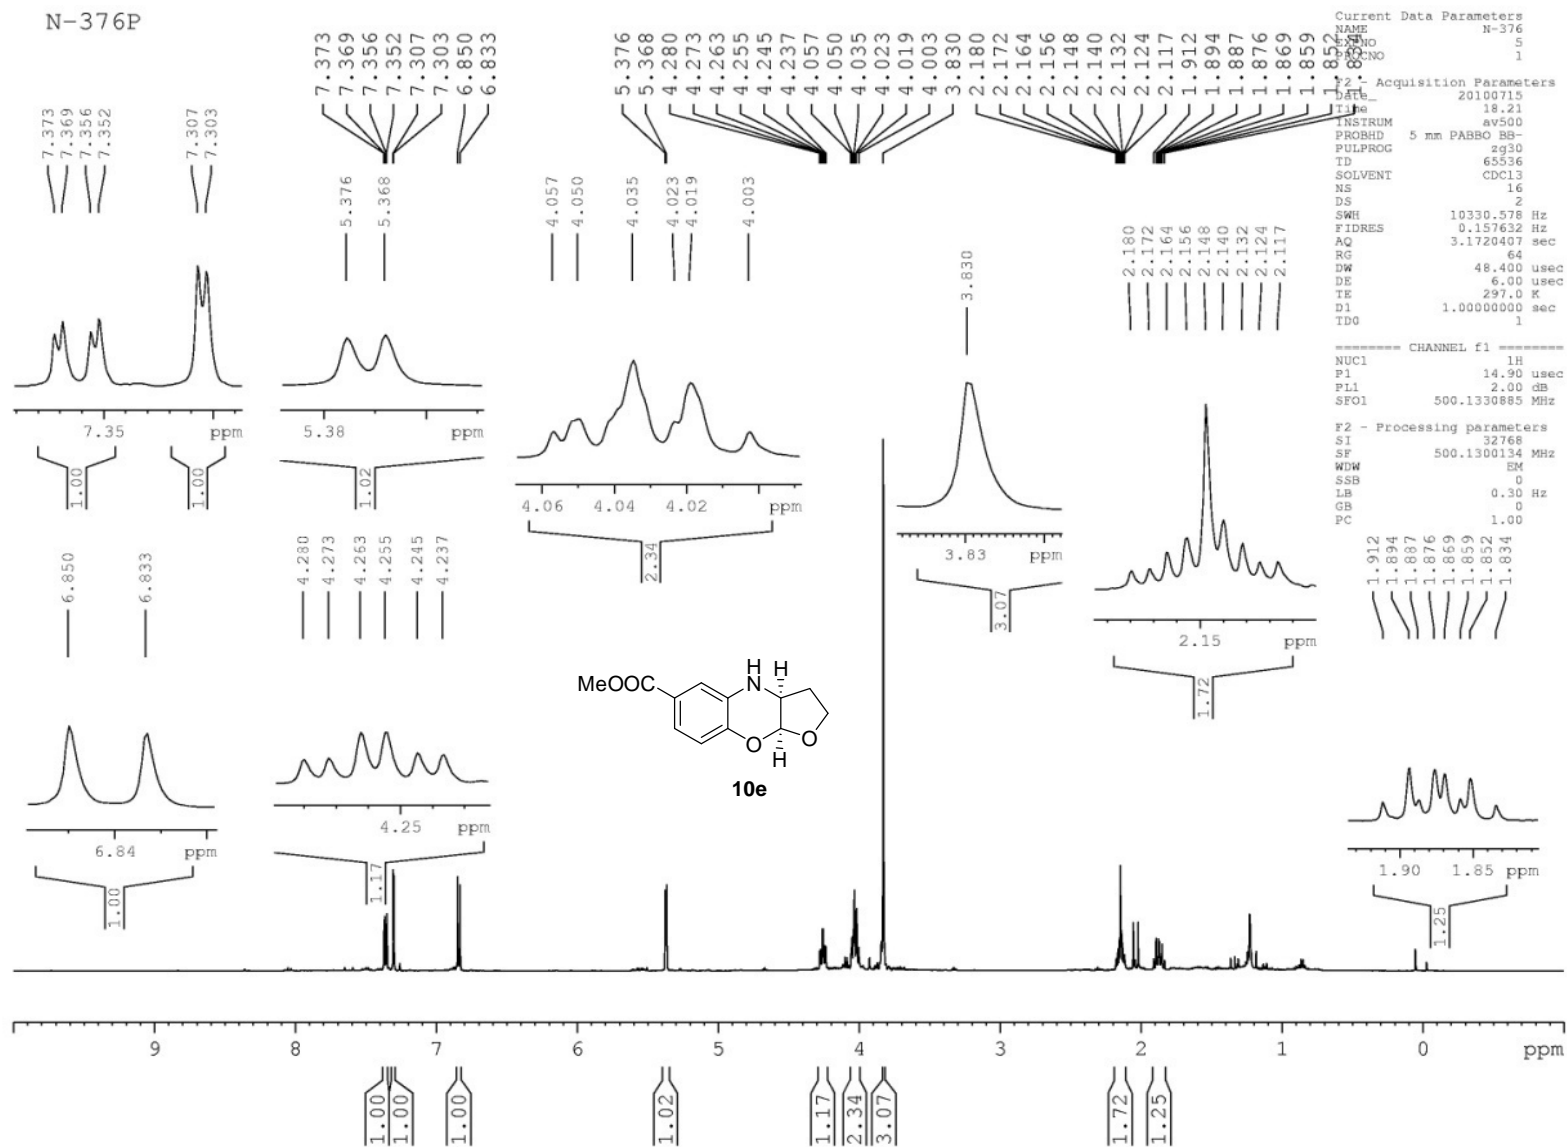

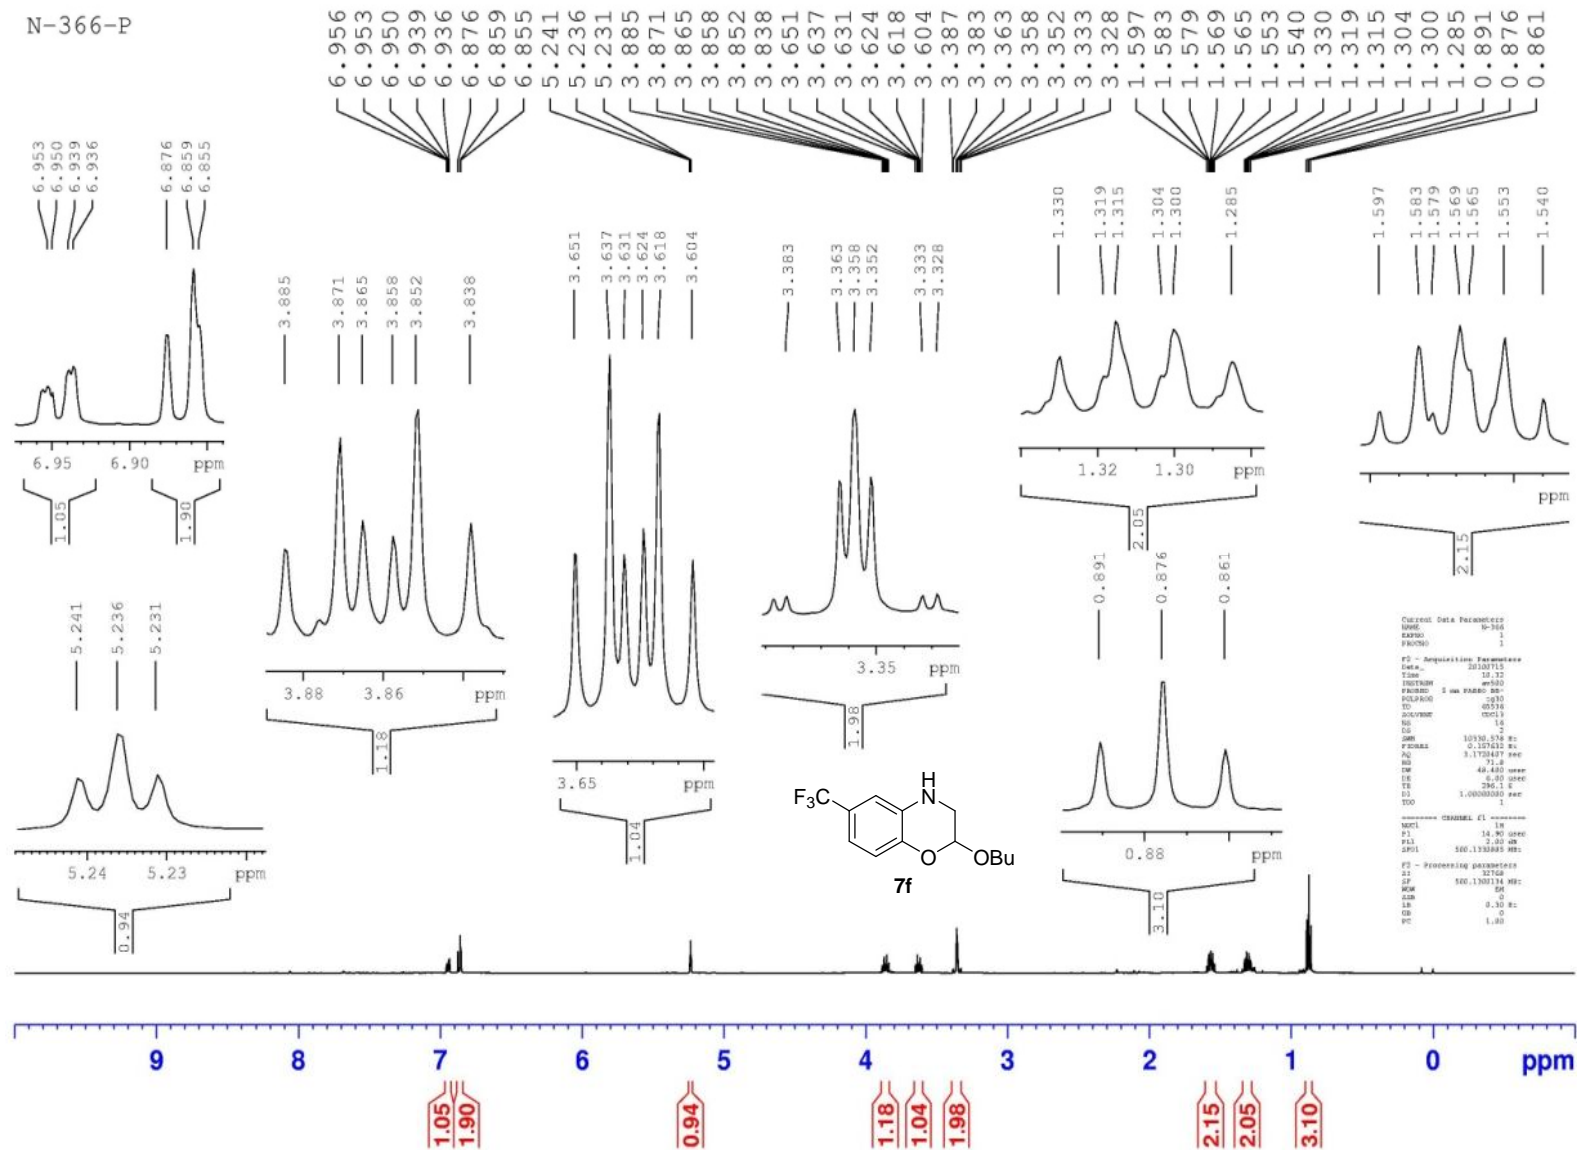

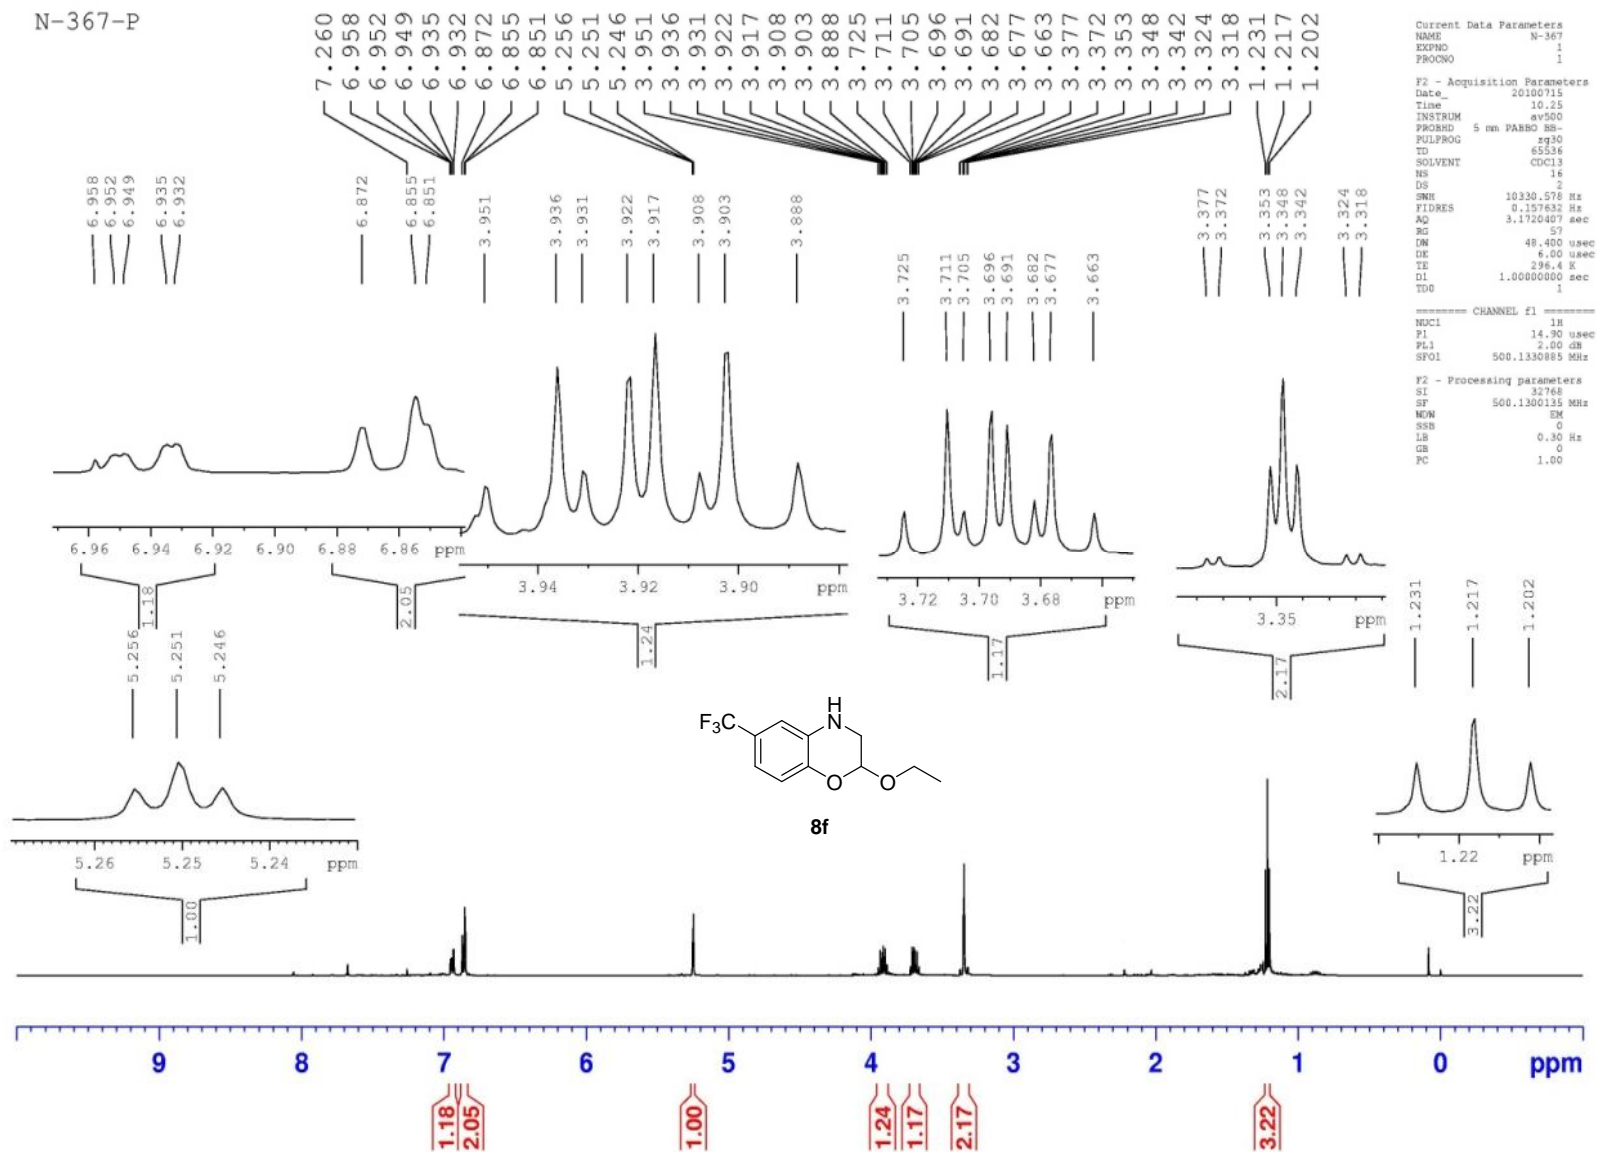

N-447-1

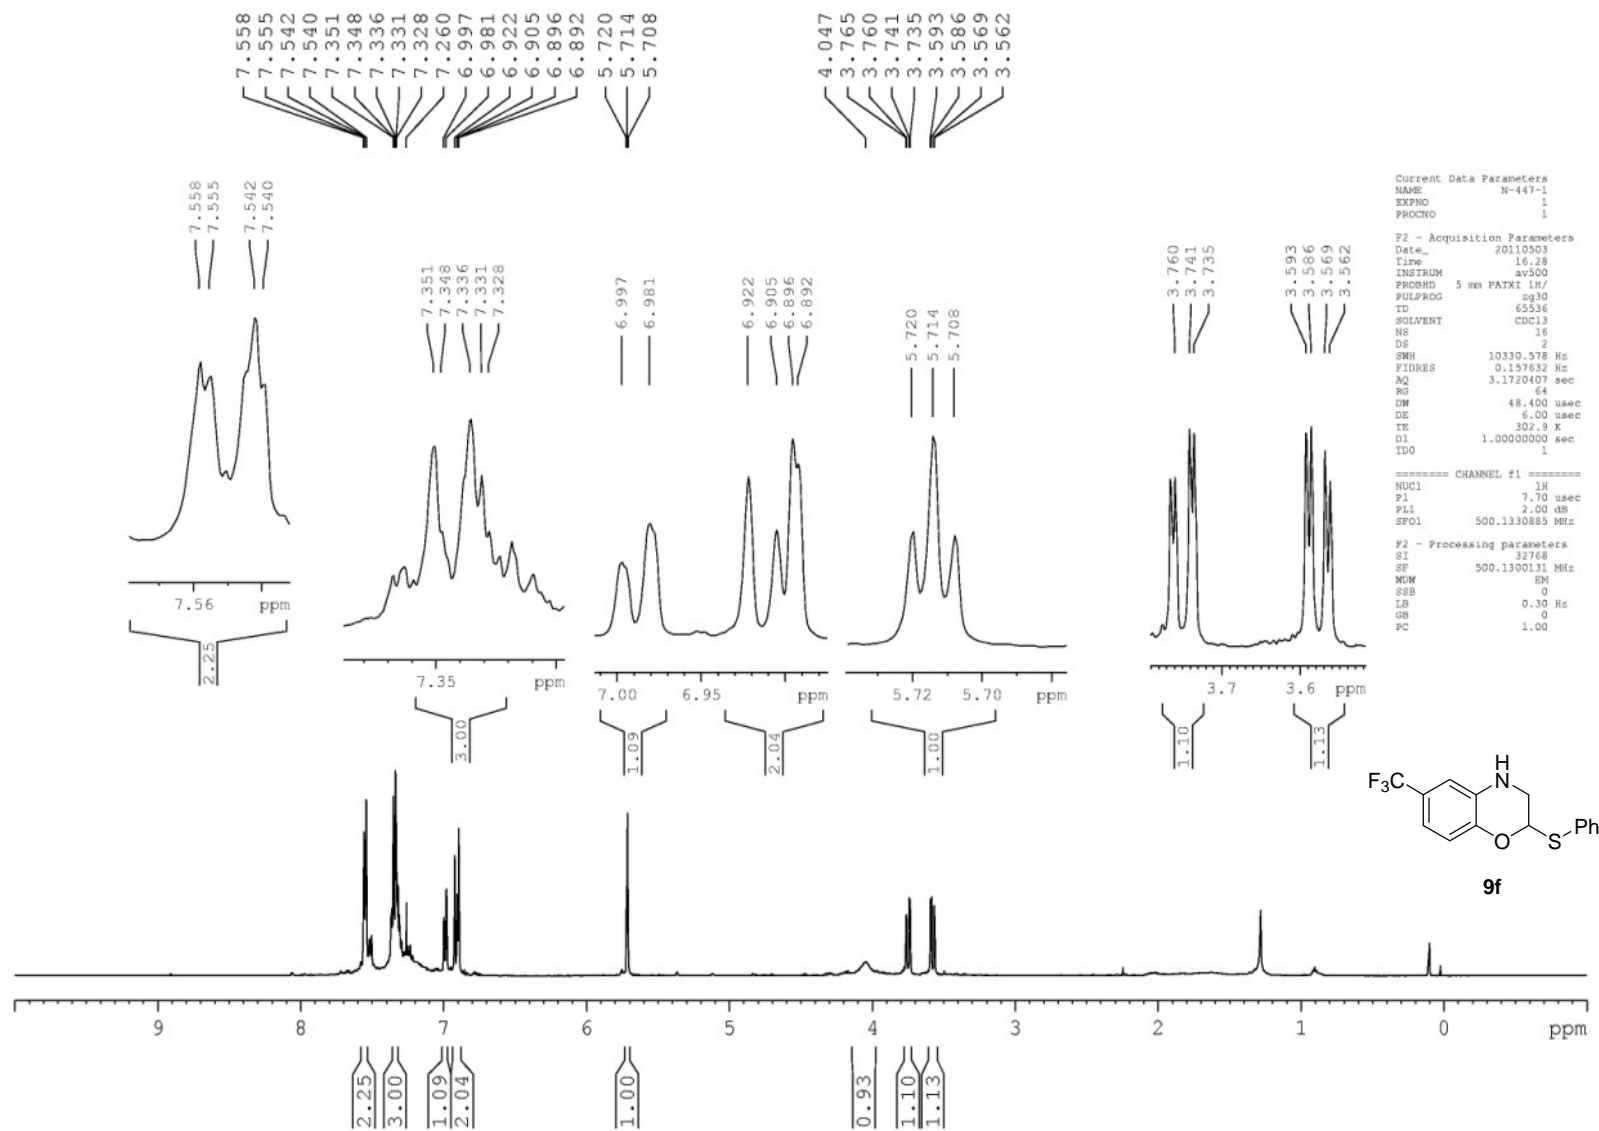

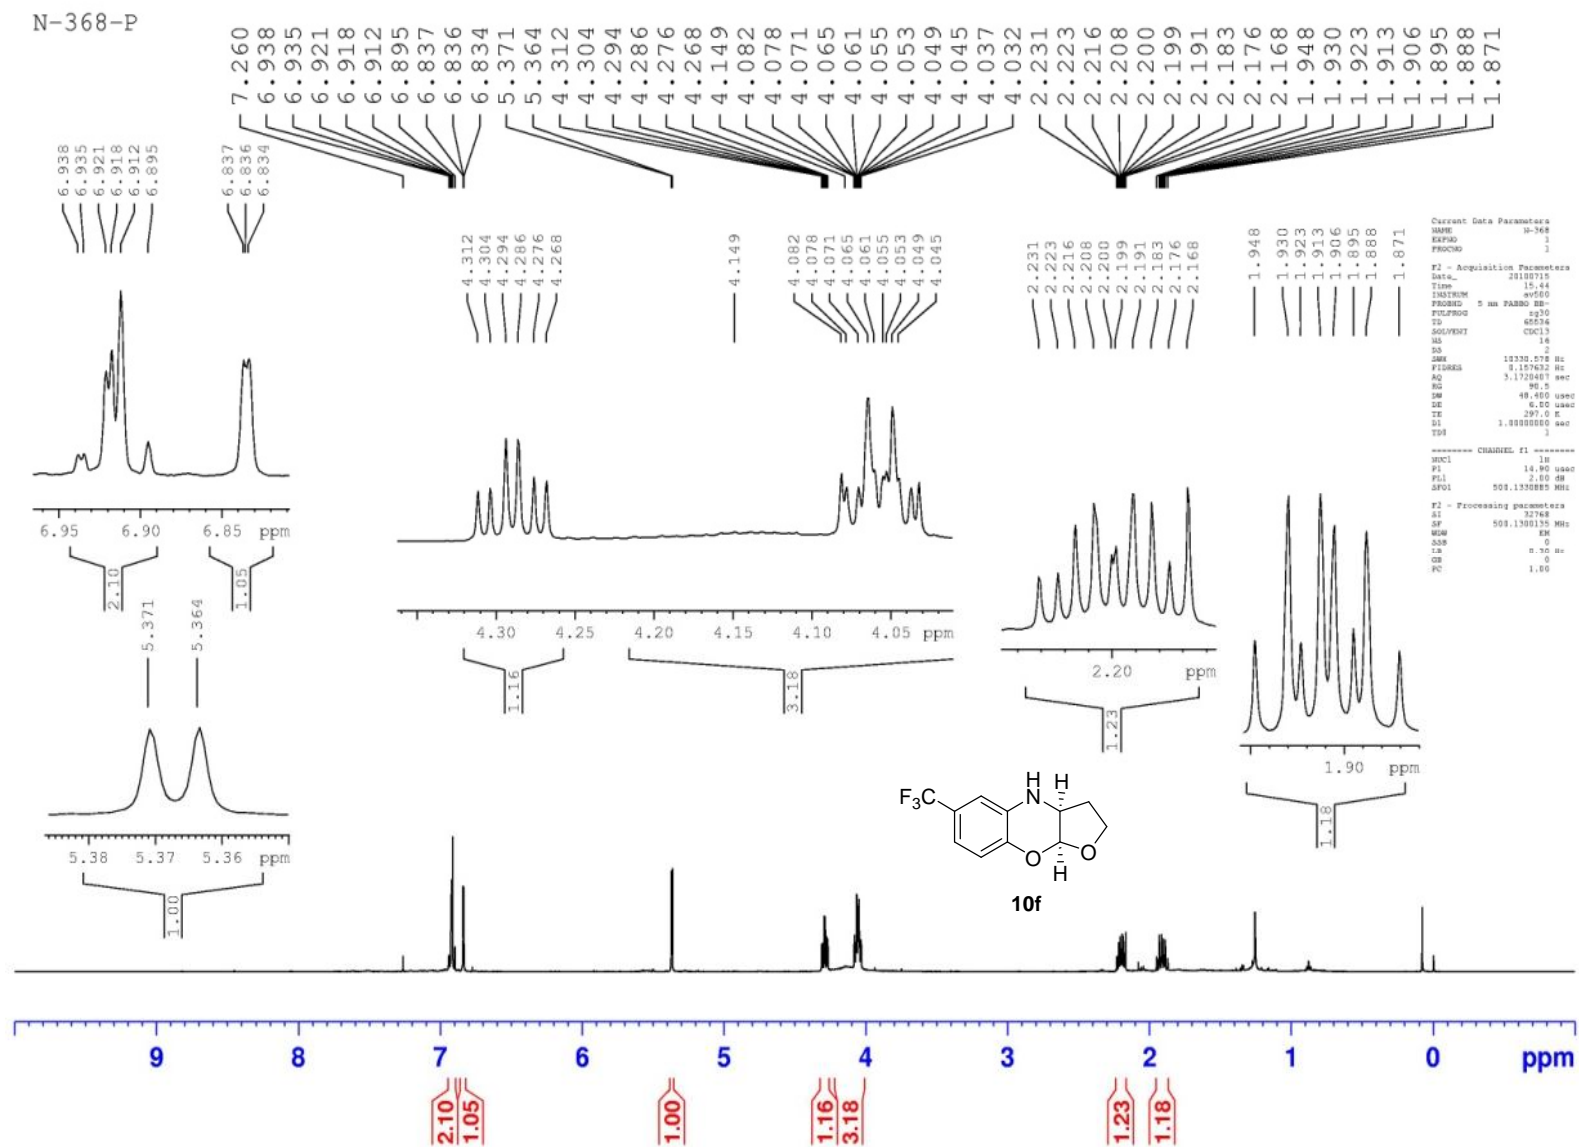

Supplement: c2ob06681e_2.pdf [file c2ob06681e_2.pdf]
