# Supplementary material for: Chemical generation of o-quinone monoimines for the rapid construction of 1,4-benzoxazine derivatives
Source: Royal Society of Chemistry journal article supplement (doi:10.1039/c2ob06681e), 2012-01-01
Supplement: c2ob06681e.pdf [file c2ob06681e.pdf]

**Electronic Supplementary Information  
(File. 1)**

**Chemical generation of *o*-quinone monoimines for the  
rapid construction of 1,4-benzoxazine derivatives**

**Naganjaneyulu Bodipati and Rama Krishna Peddinti\***

*Department of Chemistry, Indian Institute of Technology, Roorkee-247 667,  
Uttarakhand, India.*

**Table of Contents**

|                                                      |             |
|------------------------------------------------------|-------------|
| General Information.....                             | S-2         |
| Experimental Procedures & Characterization Data..... | S-2 – S-11  |
| X-ray Crystallographic Data.....                     | S-12 – S-13 |
| Computational Studies.....                           | S-13 – S-18 |

## General Information

Unless otherwise noted, chemicals were purchased from Sigma-Aldrich and Acros Organics at the highest purity grade available and were used without further purification. Solvents were distilled by using P<sub>2</sub>O<sub>5</sub> and sodium benzophenone ketyl radical. All Diels-Alder reactions were carried out under dry conditions employing oven- and flame-dried glassware with dry solvents.

NMR spectra were recorded on Brüker AMX-500 instrument using TMS as the internal standard with chemical shifts given in ppm relative to TMS. High-resolution mass spectra (HRMS) were recorded on Waters-HAB213, microOTOF-Q II-10262 and Jeol JMS600H spectrometers. The following abbreviations were used to explain the multiplicities: s = singlet, d = doublet, t = triplet, dt = doublet of triplet, qd = quartet of doublet, m = multiplet, br = broad.

## Experimental Procedures

### General procedure for compounds 7a-10a

A solution of DAIB (1.2 equiv.) in dichloromethane (2 mL) was added drop wise to a solution of 5-nitro-2-aminophenol (**1a**, 1 mmol) and alkyl vinyl ether **3** or **4** or **6** (5 mmol) or phenyl vinyl sulphide (**5**, 2 mmol) in dichloromethane (6 mL) at 0 °C. The reaction mixture was stirred at the same temperature. After completion the reaction the solvent was removed under reduced pressure and the crude reaction mixture was loaded directly on silica gel column (100-200 mesh). The product was eluted by using ethyl acetate in hexanes.

### General procedure for compounds 7b-f - 10b-f

A solution of DAIB (1.2 equiv.) in tetrahydrofuran (4 mL) was added drop wise to a mixture of 2-aminophenol derivative **1b-1f** (1 mmol), potassium bicarbonate (3 mmol) and alkyl vinyl ether **3** or **4** or **6** (5 mmol) or phenyl vinyl sulphide (**5**, 2 mmol) in tetrahydrofuran (2 mL) at 0 °C. The reaction mixture was stirred at the same temperature. After completion the reaction the solvent was removed under reduced pressure and the crude reaction mixture was loaded directly on silica gel column (100-200 mesh). The product was eluted by using ethyl acetate in hexanes.

### Characterization of benzoxazine derivatives

**Benzoxazine derivative 7a:** Reaction time 3 h; m.p. 62-63

°C; IR (film)  $\nu_{\max}$ : 3324, 3050, 2947, 1669, 1602, 1515, 1453, 1288, 1160, 966, 834  $\text{cm}^{-1}$ ;  $^1\text{H}$  NMR ( $\text{CDCl}_3$ , 500

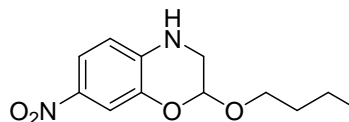

MHz):  $\delta$  7.77 (dd,  $J = 2.5, 8.5$  Hz, 1H), 7.72 (d,  $J = 2.5$  Hz, 1H), 6.53 (d,  $J = 8.5$  Hz, 1H), 5.27 (t,  $J = 2.0$  Hz, 1H), 4.53 (br, 1H), 3.85 (td,  $J = 3.0, 6.5$  Hz, 1H), 3.62 (td,  $J = 3.0, 6.5$  Hz, 1H), 3.52 (td,  $J = 2.5, 12.5$  Hz, 1H), 3.47 (qd,  $J = 2.0, 12.0$  Hz, 1H), 1.56-1.51 (m, 2H), 1.31-1.24 (m, 2H), 0.86 (t,  $J = 7.5$  Hz, 3H);  $^{13}\text{C}$  NMR ( $\text{CDCl}_3$ , 125 MHz):  $\delta$  140.1, 138.9, 138.4, 119.3, 113.5, 112.5, 93.6, 68.3, 44.2, 31.3, 19.0, 13.6; HRMS (ES+,  $m/z$ ), calcd for  $\text{C}_{12}\text{H}_{16}\text{N}_2\text{O}_4$   $[\text{M}+\text{Na}]^+$ : 275.1008, found 275.1002.

**Benzoxazine derivative 8a:** Reaction time 2 h; IR (film)  $\nu_{\max}$ :

3386, 3080, 2963, 2868, 1664, 1599, 1537, 1414, 1269, 1111,

1021, 967, 874  $\text{cm}^{-1}$ ;  $^1\text{H}$  NMR ( $\text{CDCl}_3$ , 500 MHz):  $\delta$  7.71 (dd,  $J$

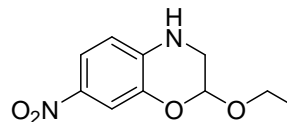

= 2.5, 9.0 Hz, 1H), 7.66 (d,  $J = 2.5$  Hz, 1H), 6.52 (d,  $J = 9.0$  Hz, 1H), 5.25 (t,  $J = 2.0$  Hz, 1H), 4.93 (br, 1H), 3.87 (dq,  $J = 3.0, 7.0$  Hz, 1H), 3.67 (dq,  $J = 2.5, 7.0$  Hz, 1H), 3.49 (dt,  $J = 2.0, 14.5$  Hz, 1H), 3.43 (dq,  $J = 2.5, 14.0$  Hz, 1H), 1.17 (t,  $J = 7.0$  Hz, 3H);  $^{13}\text{C}$  NMR ( $\text{CDCl}_3$ , 125

MHz):  $\delta$  140.3, 138.7, 138.1, 119.3, 113.3, 112.4, 93.5, 64.1, 44.0, 14.8; HRMS (ES<sup>+</sup>,  $m/z$ ), calcd for C<sub>10</sub>H<sub>12</sub>N<sub>2</sub>O<sub>4</sub> [M+Na]<sup>+</sup>: 247.0695, found 247.0699.

**Benzoxazine derivative 9a:** Reaction time 4 h; IR (film)  $\nu_{\max}$ :

3382, 3021, 2804, 1610, 1517, 1478, 1438, 1264, 1169, 971, 827, 708 cm<sup>-1</sup>; <sup>1</sup>H NMR (CDCl<sub>3</sub>, 500 MHz):  $\delta$  7.81 (dd,  $J$  = 2.5, 9.0 Hz,

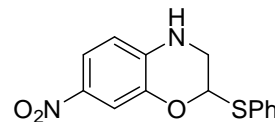

1H), 7.75 (d,  $J$  = 2.5 Hz, 1H), 7.53-7.52 (m, 2H), 7.37-7.33 (m, 3H), 6.61 (d,  $J$  = 9.0 Hz, 1H), 5.69 (t,  $J$  = 3.0 Hz, 1H), 4.68 (br, 1H), 3.86 (dd,  $J$  = 3.0, 12.0 Hz, 1H), 3.66 (dt,  $J$  = 3.0, 3.0 Hz, 1H); <sup>13</sup>C NMR (CDCl<sub>3</sub>, 125 MHz):  $\delta$  146.9, 142.3, 133.1, 117.0, 115.1, 110.4, 95.0, 64.4, 44.0, 15.0; HRMS (ES<sup>+</sup>,  $m/z$ ), calcd for C<sub>14</sub>H<sub>12</sub>N<sub>2</sub>O<sub>3</sub>S [M+Na]<sup>+</sup>: 311.0467, found 311.0468.

**Benzoxazine derivative 10a:**<sup>1</sup> Reaction time 0.5 h; m.p. 86-87 °C;

IR (film)  $\nu_{\max}$ : 3356, 3051, 2935, 2869, 1673, 1600, 1529, 1485, 1421, 1254, 1020, 972, 878 cm<sup>-1</sup>; <sup>1</sup>H NMR (DMSO-d<sub>6</sub>, 500 MHz):

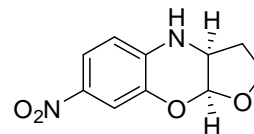

$\delta$  6.26 (dd,  $J$  = 2.5, 8.5 Hz, 1H), 6.07 (d,  $J$  = 2.5 Hz, 1H), 5.23 (d,  $J$  = 9.0 Hz, 1H), 3.90 (d,  $J$  = 3.5 Hz, 1H), 2.67-2.59 (m, 2H), 2.52-2.49 (m, 1H), 0.86-0.80 (m, 1H), 0.32-0.25 (m, 1H); <sup>13</sup>C NMR (DMSO-d<sub>6</sub>, 125 MHz):  $\delta$  140.6, 138.9, 136.4, 120.2, 112.5, 112.0, 96.1, 67.7, 52.9, 30.5; HRMS (ES<sup>+</sup>,  $m/z$ ), calcd for C<sub>10</sub>H<sub>10</sub>N<sub>2</sub>O<sub>4</sub> [M+Na]<sup>+</sup>: 245.0539, found 245.0537.

**Benzoxazine derivative 7b:** Reaction time 3 h; IR (film)

$\nu_{\max}$ : 3380, 3054, 2871, 2958, 2224, 1606, 1586, 1505, 1461, 1308, 1214, 1089, 1023, 897, 808 cm<sup>-1</sup>; <sup>1</sup>H NMR (CDCl<sub>3</sub>,

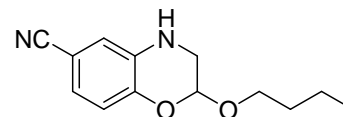

500 MHz):  $\delta$  6.97 (dd,  $J$  = 2.0, 8.5 Hz, 1H), 6.86 (d,  $J$  = 2.0 Hz, 1H), 6.83 (d,  $J$  = 8.0 Hz, 1H), 5.24 (t,  $J$  = 2.5 Hz, 1H), 4.02 (br, 1H), 3.84 (td,  $J$  = 6.5, 9.5 Hz, 1H), 3.62 (td,  $J$  = 6.5, 9.5 Hz, 1H), 3.39-3.32 (m, 2H), 1.57 1.51 (m, 2H), 1.33-1.24 (m, 2H), 0.86 (t,  $J$  = 7.5 Hz, 3H); <sup>13</sup>C

NMR (CDCl<sub>3</sub>, 125 MHz):  $\delta$  145.2, 133.7, 123.4, 119.5, 118.5, 117.9, 104.6, 94.9, 68.6, 44.1, 31.4, 19.0, 13.7; HRMS (FAB+, *m/z*), calcd for C<sub>13</sub>H<sub>16</sub>N<sub>2</sub>O<sub>2</sub> [M]<sup>+</sup>: 232.1212, found 232.1216.

**Benzoxazine derivative 8b**:<sup>1</sup> Reaction time 2 h; IR(film)  $\nu_{\max}$ :

3387, 3064, 2977, 2917, 2223, 1606, 1504, 1449, 1373, 1313, 1207, 1119, 1087, 937, 881 cm<sup>-1</sup>; <sup>1</sup>H NMR (CDCl<sub>3</sub>, 500 MHz):  $\delta$

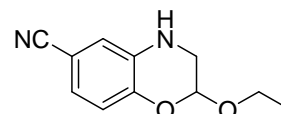

6.97 (dd, *J* = 2.0, 8.5 Hz, 1H), 6.86 (d, *J* = 2.0 Hz, 1H), 6.83 (d, *J* = 8.5 Hz, 1H), 5.26 (t, *J* = 2.5 Hz, 1H), 3.92 (qd, *J* = 7.0, 9.5 Hz, 1H), 3.69 (qd, *J* = 7.0 10.0 Hz, 1H), 3.91-3.32 (m, 2H), 1.21 (t, *J* = 7.0 Hz, 3H); <sup>13</sup>C NMR (CDCl<sub>3</sub>, 125 MHz):  $\delta$  145.2, 133.7, 123.4, 119.5, 118.5, 117.9, 104.6, 94.8, 64.4, 44.1, 15.0; HRMS (FAB+, *m/z*), calcd for C<sub>11</sub>H<sub>12</sub>N<sub>2</sub>O<sub>2</sub> [M+H]<sup>+</sup>: 205.0977, found 205.0972.

**Benzoxazine derivative 9b**:<sup>1</sup> Reaction time 4 h; IR (film)  $\nu_{\max}$ :

3391, 3054, 2923, 1588, 1500, 1445, 1338, 1299, 1028, 932, 800 cm<sup>-1</sup>; <sup>1</sup>H NMR (CDCl<sub>3</sub>, 500 MHz):  $\delta$  7.52-7.51 (m, 2H), 7.37-

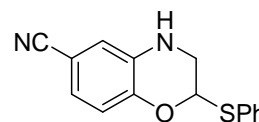

7.31 (m, 3H), 7.01 (dd, *J* = 2.0, 8.0 Hz, 1H), 6.90 (d, *J* = 2.0 Hz, 1H), 6.87 (d, *J* = 8.0 Hz, 1H), 5.70 (t, *J* = 3.0 Hz, 1H), 3.75 (dd, *J* = 3.0, 12.0 Hz, 1H), 3.57 (dd, *J* = 3.5, 12.0 Hz, 1H); <sup>13</sup>C NMR (CDCl<sub>3</sub>, 125 MHz):  $\delta$  145.0, 133.5, 132.8, 132.5, 129.1, 128.1, 123.6, 119.4, 118.5, 118.5, 105.3, 81.9, 29.4; HRMS (FAB+, *m/z*), calcd for C<sub>15</sub>H<sub>12</sub>N<sub>2</sub>OS [M+H]<sup>+</sup>: 269.0749, found 269.0746.

**Benzoxazine derivative 10b**: Reaction time 1 h; IR (film)  $\nu_{\max}$ :

3357, 3062, 2916, 1602, 1585, 1502, 1316, 1291, 1259, 1108, 902, 851 cm<sup>-1</sup>; <sup>1</sup>H NMR (CDCl<sub>3</sub>, 500 MHz):  $\delta$  6.98 (dd, *J* = 2.0, 8.5 Hz,

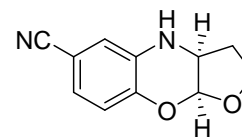

1H), 6.88 (d, *J* = 8.0 Hz, 1H), 6.86 (d, *J* = 2.0 Hz, 1H), 5.37 (d, *J* = 4.0 Hz, 1H), 4.30 (dt, *J* =

4.0, 9.0 Hz, 1H), 4.20 (br, 1H), 4.09-4.04 (m, 2H), 2.25- 2.18 (m, 1H), 1.89 (qd,  $J = 9.0, 12.5$  Hz, 1H);  $^{13}\text{C}$  NMR ( $\text{CDCl}_3$ , 125 MHz):  $\delta$  145.1, 131.2, 123.2, 119.4, 117.8, 117.3, 104.6, 96.4, 68.0, 53.8, 29.3; HRMS (ESI,  $m/z$ ), calcd for  $\text{C}_{11}\text{H}_{10}\text{N}_2\text{O}_2$   $[\text{M}+\text{Na}]^+$ : 225.064, found 225.0652.

**Benzoxazine derivative 7c:**<sup>1</sup> Reaction time 3 h; IR (film)

$\nu_{\text{max}}$ : 3369, 3073, 2961, 2933, 2221, 1652, 1602, 1595, 1495, 1456, 1372, 1362, 1223, 1030, 936, 862, 765  $\text{cm}^{-1}$ ;  $^1\text{H}$  NMR

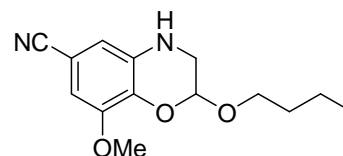

( $\text{CDCl}_3$ , 500 MHz):  $\delta$  6.58 (s, 2H), 5.34 (t,  $J = 2.5$  Hz, 1H), 3.85-3.82 (m, 1H), 3.84 (s, 3H), 3.64 (td,  $J = 6.5, 10.0$  Hz, 1H), 3.38-3.32 (m, 2H), 1.56-1.48 (m, 2H), 1.27-1.21 (m, 2H), 0.82 (t,  $J = 7.5$  Hz, 3H);  $^{13}\text{C}$  NMR ( $\text{CDCl}_3$ , 125 MHz):  $\delta$  149.2, 134.2, 134.1, 119.5, 113.0, 105.7, 103.9, 94.4, 68.5, 56.1, 44.0, 31.3, 19.0, 13.6; HRMS (FAB+,  $m/z$ ), calcd for  $\text{C}_{14}\text{H}_{18}\text{N}_2\text{O}_3$   $[\text{M}+\text{H}]^+$ : 263.1396, found 263.1398.

**Benzoxazine derivative 8c:**<sup>1</sup> Reaction time 2 h; IR (film)  $\nu_{\text{max}}$ :

3365, 3037, 2958, 2930, 2221, 1658, 1602, 1588, 1496, 1465, 1377, 1352, 1241, 1211, 1176, 1083, 1029, 936, 877, 796  $\text{cm}^{-1}$ ;

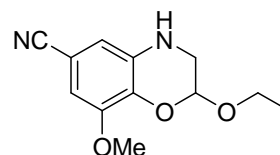

$^1\text{H}$  NMR ( $\text{CDCl}_3$ , 500 MHz):  $\delta$  6.56 (s, 2H), 5.33 (t,  $J = 2.5$  Hz, 1H), 3.88 (qd,  $J = 7.0, 10.0$  Hz, 1H), 3.82 (s, 3H), 3.69 (qd,  $J = 7.0, 10.0$  Hz, 1H), 3.35-3.28 (m, 2H), 1.17 (t,  $J = 7.5$  Hz, 3H);  $^{13}\text{C}$  NMR ( $\text{CDCl}_3$ , 125 MHz):  $\delta$  149.1, 134.2, 134.0, 119.5, 112.9, 105.6, 103.8, 94.4, 64.3, 56.1, 43.9, 14.9; HRMS (FAB+,  $m/z$ ), calcd for  $\text{C}_{12}\text{H}_{14}\text{N}_2\text{O}_3$   $[\text{M}+\text{H}]^+$ : 235.1083, found 235.1088.

**Benzoxazine derivative 9c:**<sup>1</sup> Reaction time 4 h; IR (film)  $\nu_{\text{max}}$ :

3381, 3063, 2954, 1593, 1500, 1454, 1331, 1295, 1021, 932, 800

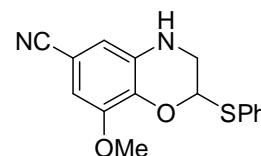

cm<sup>-1</sup>; <sup>1</sup>H NMR (CDCl<sub>3</sub>, 500 MHz): δ 7.55-7.52(m, 2H), 7.32-7.18 (m, 2H), 6.62-6.59 (m, 2H), 5.75 (t, *J* = 2.5 Hz, 1H), 4.23 (br, 1H), 3.83 (s, 3H), 3.71 (dd, *J* = 3.0, 12.0 Hz, 1H), 3.56 (dd, *J* = 2.5, 12.0 Hz, 1H); <sup>13</sup>C NMR (CDCl<sub>3</sub>, 125 MHz): δ 149.7, 134.0, 133.8, 132.8, 132.6, 129.0, 128.0, 119.4, 112.6, 106.0, 104.5, 81.9, 56.2, 45.0; HRMS (FAB+, *m/z*), calcd for C<sub>16</sub>H<sub>14</sub>N<sub>2</sub>O<sub>2</sub>S [M+H]<sup>+</sup>: 299.0854, found 299.0852.

**Benzoxazine derivative 10c:**<sup>1</sup> Reaction time 1 h; IR (film) ν<sub>max</sub>:

3398, 3087, 2988, 2223, 1595, 1521, 1493, 1352, 1239, 1123, 1053, 907, 831 cm<sup>-1</sup>; <sup>1</sup>H NMR (CDCl<sub>3</sub>, 500 MHz): δ 6.58 (d, *J* = 1.5 Hz, 1H), 6.55 (d, *J* = 1.5 Hz, 1H), 5.33 (d, *J* = 3.5 Hz, 1H), 4.28 (dt, *J* =

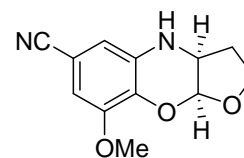

4.0, 9.0 Hz, 1H), 4.11-4.00 (m, 2H), 3.82 (s, 3H), 2.22-2.16 (m, 1H), 1.86 (qd, *J* = 9.0, 12.0 Hz, 1H); <sup>13</sup>C NMR (CDCl<sub>3</sub>, 125 MHz): δ 148.9, 133.8, 131.9, 119.5, 111.5, 105.2, 104.0, 96.1, 67.9, 56.0, 53.8, 29.3; HRMS (FAB+, *m/z*), calcd for C<sub>12</sub>H<sub>12</sub>N<sub>2</sub>O<sub>3</sub> [M+H]<sup>+</sup>: 233.0926, found 233.0921.

**Benzoxazine derivative 7d:** Reaction time 8 h; IR (film) ν<sub>max</sub>:

3380, 3054, 2871, 2958, 2224, 1606, 1586, 1505, 1461, 1308, 1214, 1089, 1023, 897, 808 cm<sup>-1</sup>; <sup>1</sup>H NMR (CDCl<sub>3</sub>, 500 MHz):

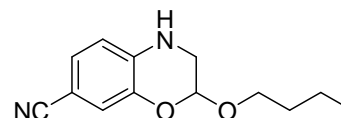

δ 6.97 (dd, *J* = 2.0, 8.5 Hz, 1H), 6.86 (d, *J* = 2.0 Hz, 1H), 6.83 (d, *J* = 8.0 Hz, 1H), 5.24 (t, *J* = 2.5 Hz, 1H), 4.02 (br, 1H), 3.84 (td, *J* = 6.5, 9.5 Hz, 1H), 3.62 (td, *J* = 6.5, 9.5 Hz, 1H), 3.39-3.32 (m, 2H), 1.57 1.51 (m, 2H), 1.33-1.24 (m, 2H), 0.86 (t, *J* = 7.5 Hz, 3H); <sup>13</sup>C NMR (CDCl<sub>3</sub>, 125 MHz): δ 145.2, 133.7, 123.4, 119.5, 118.5, 117.9, 104.6, 94.9, 68.6, 44.1, 31.4, 19.0, 13.7; HRMS (FAB+, *m/z*), calcd for C<sub>13</sub>H<sub>16</sub>N<sub>2</sub>O<sub>2</sub> [M+H]<sup>+</sup>: 233.129, found 233.1294.

**Benzoxazine derivative 8d:** Reaction time 7 h; IR(film)  $\nu_{\max}$ : 3387,

3064, 2977, 2917, 2223, 1606, 1504, 1449, 1373, 1313, 1207, 1119,

1087, 937, 881  $\text{cm}^{-1}$ ;  $^1\text{H}$  NMR ( $\text{CDCl}_3$ , 500 MHz):  $\delta$  6.97 (dd,  $J =$

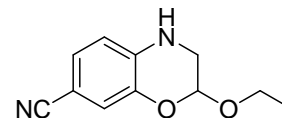

2.0, 8.5 Hz, 1H), 6.86 (d,  $J = 2.0$  Hz, 1H), 6.83 (d,  $J = 8.5$  Hz, 1H), 5.26 (t,  $J = 2.5$  Hz, 1H),

3.92 (qd,  $J = 7.0, 9.5$  Hz, 1H), 3.69 (qd,  $J = 7.0, 10.0$  Hz, 1H), 3.91-3.32 (m, 2H), 1.21 (t,  $J =$

7.0 Hz, 3H);  $^{13}\text{C}$  NMR ( $\text{CDCl}_3$ , 125 MHz):  $\delta$  145.2, 133.7, 123.4, 119.5, 118.5, 117.9, 104.6,

94.8, 64.4, 44.1, 15.0; HRMS (FAB+,  $m/z$ ), calcd for  $\text{C}_{11}\text{H}_{12}\text{N}_2\text{O}_2$   $[\text{M}+\text{H}]^+$ : 205.0977, found

205.0972.

**Benzoxazine derivative 9d:**<sup>1</sup> Reaction time 8 h; IR (film)  $\nu_{\max}$ :

3391, 3054, 2923, 1588, 1500, 1445, 1338, 1299, 1028, 932, 800

$\text{cm}^{-1}$ ;  $^1\text{H}$  NMR ( $\text{CDCl}_3$ , 500 MHz):  $\delta$  7.52-7.51 (m, 2H), 7.37-7.31

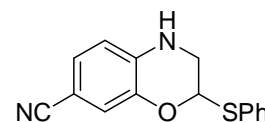

(m, 3H), 7.01 (dd,  $J = 2.0, 8.0$  Hz, 1H), 6.90 (d,  $J = 2.0$  Hz, 1H), 6.87 (d,  $J = 8.0$  Hz, 1H),

5.70 (t,  $J = 3.0$  Hz, 1H), 3.75 (dd,  $J = 3.0, 12.0$  Hz, 1H), 3.57 (dd,  $J = 3.5, 12.0$  Hz, 1H);  $^{13}\text{C}$

NMR ( $\text{CDCl}_3$ , 125 MHz):  $\delta$  145.0, 133.5, 132.8, 132.5, 129.1, 128.1, 123.6, 119.4, 118.5,

118.5, 105.3, 81.9, 29.4; HRMS (FAB+,  $m/z$ ), calcd for  $\text{C}_{15}\text{H}_{12}\text{N}_2\text{OS}$   $[\text{M}+\text{H}]^+$ : 269.0749,

found 269.0752.

**Benzoxazine derivative 10d:** Reaction time 4 h; IR (film)  $\nu_{\max}$ :

3357, 3062, 2916, 1602, 1585, 1502, 1316, 1291, 1259, 1108, 902,

851  $\text{cm}^{-1}$ ;  $^1\text{H}$  NMR ( $\text{CDCl}_3$ , 500 MHz):  $\delta$  6.98 (dd,  $J = 2.0, 8.5$  Hz,

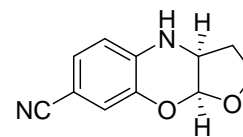

1H), 6.88 (d,  $J = 8.0$  Hz, 1H), 6.86 (d,  $J = 2.0$  Hz, 1H), 5.37 (d,  $J = 4.0$  Hz, 1H), 4.30 (dt,  $J =$

4.0, 9.0 Hz, 1H), 4.20 (br, 1H), 4.09-4.04 (m, 2H), 2.25- 2.18 (m, 1H), 1.89 (qd,  $J = 9.0, 12.5$

Hz, 1H) ppm;  $^{13}\text{C}$  NMR ( $\text{CDCl}_3$ , 125 MHz):  $\delta$  145.1, 131.2, 123.2, 119.4, 117.8, 117.3,



104.6, 96.4, 68.0, 53.8, 29.3; HRMS (FAB+,  $m/z$ ), calcd for  $C_{11}H_{10}N_2O_2$   $[M+H]^+$ : 203.0821, found 203.0826.

**Benzoxazine derivative 7e:**<sup>1</sup> Reaction time 3 h; IR

(film)  $\nu_{\max}$ : 3356, 2988, 2943, 2360, 1699, 1597, 1488,

1439, 1307, 1208, 1113, 1050, 983, 846, 726  $cm^{-1}$ ;  $^1H$

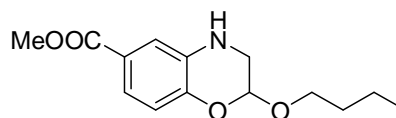

NMR ( $CDCl_3$ , 500 MHz):  $\delta$  7.40 (dd,  $J = 2.0, 8.0$  Hz, 1H), 7.33 (d,  $J = 2.0$  Hz, 1H), 6.82 (d,  $J = 8.0$  Hz, 1H), 5.23 (t,  $J = 3.0$  Hz, 1H), 3.87-3.83 (m, 1H), 3.83 (s, 3H), 3.61 (td,  $J = 7.0, 10.0$  Hz, 1H), 3.37-3.30 (m, 2H), 1.57-1.52 (m, 2H), 1.31-1.24 (m, 2H), 0.85 (t,  $J = 7.5$  Hz, 3H);

$^{13}C$  NMR ( $CDCl_3$ , 125 MHz):  $\delta$  167.1, 145.8, 132.7, 123.4, 121.3, 117.2, 116.9, 95.1, 68.4, 51.8, 44.4, 31.4, 19.1, 13.7; HRMS (FAB+,  $m/z$ ), calcd for  $C_{14}H_{19}NO_4$   $[M+H]^+$ : 266.1392, found 266.1398.

**Benzoxazine derivative 8e:** Reaction time 2 h; IR (film)

$\nu_{\max}$ : 3365, 2992, 2363, 1696, 1592, 1479, 1438, 1208,

1113, 1050, 983, 846, 726  $cm^{-1}$ ;  $^1H$  NMR ( $CDCl_3$ , 500

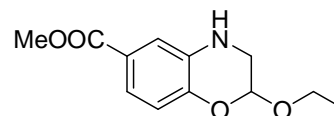

MHz):  $\delta$  7.41 (dd,  $J = 2.0, 9.5$  Hz, 1H), 7.33 (dd,  $J = 1.5$  Hz, 1H), 6.82 (d,  $J = 8.0$  Hz, 1H), 5.25 (t,  $J = 2.5$  Hz, 1H), 3.95-3.89 (m, 1H), 3.84 (s, 3H), 3.72-3.65 (m, 1H), 3.38-3.31 (m, 2H), 1.24 (br, 1H), 1.21 (t,  $J = 7.0$  Hz, 3H);  $^{13}C$  NMR ( $CDCl_3$ , 125 MHz):  $\delta$  167.0, 145.8, 132.6, 123.5, 121.3, 117.2, 116.9, 95.0, 64.2, 51.8, 44.4, 15.0; HRMS (FAB+,  $m/z$ ), calcd for  $C_{12}H_{15}NO_4$   $[M+H]^+$ : 238.1079, found 238.1081.

**Benzoxazine derivative 9e:**<sup>1</sup> Reaction time 5 h; IR (film)  $\nu_{\max}$ :

3355, 2982, 2361, 1699, 1597, 1421, 1208, 1052, 974, 841,

726  $cm^{-1}$ ;  $^1H$  NMR ( $CDCl_3$ , 500 MHz):  $\delta$  7.59-7.55 (m, 2H),

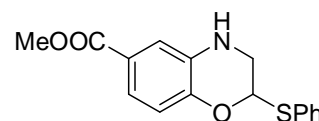

7.48 (dd,  $J = 2.0, 8.5$  Hz, 1H), 7.41 (d,  $J = 2.0$  Hz, 1H), 7.38-7.32 (m, 4H), 6.90 (d,  $J = 8.5$  Hz, 1H), 3.90 (s, 3H), 3.77 (dd,  $J = 3.0, 12.0$  Hz, 1H), 3.59 (dd,  $J = 3.5, 12.0$  Hz, 1H);  $^{13}\text{C}$  NMR ( $\text{CDCl}_3$ , 125 MHz):  $\delta$  167.0, 145.3, 133.2, 132.5, 132.3, 129.0, 127.8, 123.9, 121.3, 117.5, 117.2, 82.0, 51.8, 45.2; HRMS (FAB+,  $m/z$ ), calcd for  $\text{C}_{16}\text{H}_{15}\text{NO}_3\text{S}$   $[\text{M}+\text{H}]^+$ : 302.0851, found 302.0855.

**Benzoxazine derivative 10e:**<sup>1</sup> Reaction time 1 h; IR (film)  $\nu_{\text{max}}$ :

3362, 2991, 1721, 1696, 1594, 1479, 1438, 1208, 1050, 983,

846, 726  $\text{cm}^{-1}$ ;  $^1\text{H}$  NMR ( $\text{CDCl}_3$ , 500 MHz):  $\delta$  7.36 (dd,  $J = 2.0,$

8.5 Hz, 1H), 7.31 (d,  $J = 2.0$  Hz, 1H), 6.84 (d,  $J = 8.5$  Hz, 1H), 5.37 (d,  $J = 4.0$  Hz, 1H), 4.26

(dt,  $J = 4.0, 9.0$  Hz, 1H), 4.06-4.00 (m, 2H), 3.83 (s, 3H), 2.19-2.10 (m, 1H), 1.87 (qd,  $J =$

9.0, 12.5 Hz, 1H);  $^{13}\text{C}$  NMR ( $\text{CDCl}_3$ , 125 MHz):  $\delta$  167.03, 145.5, 130.3, 123.6, 120.8, 116.7,

115.8, 96.5, 67.9, 54.0, 51.8, 29.2; HRMS (FAB+,  $m/z$ ), calcd for  $\text{C}_{12}\text{H}_{13}\text{NO}_4$   $[\text{M}+\text{H}]^+$ :

236.0923, found 236.0924.

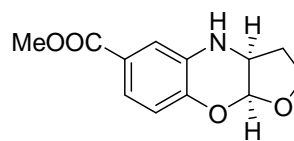

**Benzoxazine derivative 7f:**<sup>1</sup> Reaction time 3 h; IR (film)

$\nu_{\text{max}}$ : 3398, 3087, 2988, 2853, 2223, 1595, 1521, 1493,

1407, 1372, 1352, 1239, 1172, 1123, 1053, 955, 907, 803

$\text{cm}^{-1}$ ;  $^1\text{H}$  NMR ( $\text{CDCl}_3$ , 500 MHz):  $\delta$  6.94 (dd,  $J = 1.5, 7.0$  Hz, 1H), 6.87 (d,  $J = 8.5$  Hz, 1H),

6.86 (d,  $J = 2.0$  Hz, 1H), 5.23 (t,  $J = 2.5$  Hz, 1H), 3.86 (td,  $J = 7.0, 10.0$  Hz, 1H), 3.63 (td,  $J =$

7.0, 10.0 Hz, 1H), 3.39-3.32 (m, 2H), 1.60-1.54 (m, 2H), 1.34-1.27 (m, 2H), 0.87 (t,  $J = 7.5$

Hz, 3H);  $^{13}\text{C}$  NMR ( $\text{CDCl}_3$ , 125 MHz):  $\delta$  144.0, 133.0, 125.4, 123.6, 117.3, 116.1, 112.6,

94.8, 68.5, 44.3, 31.5, 19.1, 13.7; HRMS (FAB+,  $m/z$ ), calcd for  $\text{C}_{13}\text{H}_{16}\text{F}_3\text{NO}_2$   $[\text{M}+\text{H}]^+$ :

276.1211, found 276.1216.

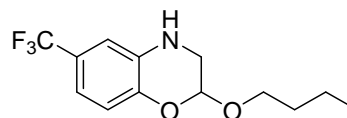

**Benzoxazine derivative 8f:**<sup>1</sup> Reaction time 3 h; IR (film)  $\nu_{\max}$ :

3387, 3066, 2983, 1618, 1594, 1498, 1334, 1207, 1118, 939, 880

$\text{cm}^{-1}$ ;  $^1\text{H}$  NMR ( $\text{CDCl}_3$ , 500 MHz):  $\delta$  6.94 (dd,  $J = 1.5, 8.5$  Hz,

1H), 6.86 (d,  $J = 8.5$  Hz, 1H), 6.85 (d,  $J = 2.0$  Hz, 1H), 5.25 (t,  $J = 2.5$  Hz, 1H), 3.92 (qd,  $J = 7.5, 10.0$  Hz, 1H), 3.69 (qd,  $J = 7.0, 9.5$  Hz, 1H), 3.37-3.31 (m, 2H), 1.21 (t,  $J = 7.5$  Hz, 3H);

$^{13}\text{C}$  NMR ( $\text{CDCl}_3$ , 125 MHz):  $\delta$  144.0, 133.0, 125.4, 123.6, 117.2, 116.1, 112.6, 94.6, 64.2, 44.3, 15.0; HRMS (FAB+,  $m/z$ ), calcd for  $\text{C}_{11}\text{H}_{12}\text{F}_3\text{NO}_2$   $[\text{M}+\text{H}]^+$ : 248.0898, found 248.0892.

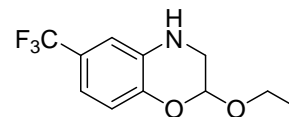

**Benzoxazine derivative 9f:** Reaction time 6 h; IR (film)  $\nu_{\max}$ :

3362, 3073, 2940, 2841, 1613, 1486, 1465, 1211, 1062, 865, 820

$\text{cm}^{-1}$ ;  $^1\text{H}$  NMR ( $\text{CDCl}_3$ , 500 MHz):  $\delta$  7.56-7.53 (m, 2H), 7.36-7.31

(m, 3H), 6.99 (d,  $J = 8.0$  Hz, 1H), 6.92 (s, 1H), 6.90-6.88 (m, 1H), 5.71 (t,  $J = 3.0$  Hz, 1H), 4.04 (br, 1H), 7.50 (dd,  $J = 3.0, 12.5$  Hz, 1H), 3.57 (dd,  $J = 3.5, 12.0$  Hz, 1H);  $^{13}\text{C}$  NMR

( $\text{CDCl}_3$ , 125 MHz):  $\delta$  143.8, 133.2, 132.8, 132.4, 129.1, 127.9, 124.5, 123.2, 117.9, 116.3, 112.4, 81.8, 45.3; HRMS (FAB+,  $m/z$ ), calcd for  $\text{C}_{15}\text{H}_{12}\text{F}_3\text{NOS}$   $[\text{M}+\text{H}]^+$ : 312.067, found 312.0679.

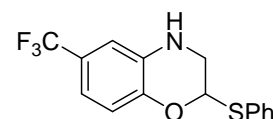

**Benzoxazine derivative 10f:**<sup>1</sup> Reaction time 2 h; IR (film)  $\nu_{\max}$ :

3373, 3083, 2920, 2847, 1610, 1496, 1453, 1411, 1341, 1211, 1053,

894, 811  $\text{cm}^{-1}$ ;  $^1\text{H}$  NMR ( $\text{CDCl}_3$ , 500 MHz):  $\delta$  6.93-6.89 (m, 2H),

6.83 (d,  $J = 1.0$  Hz, 1H), 5.37 (d,  $J = 3.5$  Hz, 1H), 4.29 (dt,  $J = 4.0, 9.0$  Hz, 1H), 4.08-4.03 (m, 2H), 2.23-2.16 (m, 1H), 1.91 (qd,  $J = 8.5, 12.0$  Hz, 1H);  $^{13}\text{C}$  NMR ( $\text{CDCl}_3$ , 125 MHz):  $\delta$

143.8, 130.8, 125.4, 124.2, 117.1, 115.7, 111.2, 96.3, 67.9, 54.0, 29.5; HRMS (FAB+,  $m/z$ ), calcd for  $\text{C}_{11}\text{H}_{10}\text{F}_3\text{NO}_2$   $[\text{M}+\text{H}]^+$ : 246.0742, found 246.0744.

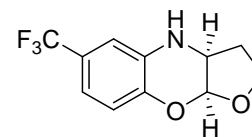

## X-ray Crystallographic Data

|                                                  |                                                                   |
|--------------------------------------------------|-------------------------------------------------------------------|
| Formula                                          | C <sub>12</sub> H <sub>16</sub> N <sub>2</sub> O <sub>4</sub>     |
| Formula Wt.                                      | 252.27                                                            |
| Crystal habit                                    | Blocks                                                            |
| Crystal color                                    | Orange                                                            |
| Crystal system                                   | Triclinic                                                         |
| Space group                                      | <i>P</i> $\bar{1}$                                                |
| <i>a</i> (Å)                                     | 8.418(2)                                                          |
| <i>b</i> (Å)                                     | 8.861(2)                                                          |
| <i>c</i> (Å)                                     | 9.944(2)                                                          |
| $\alpha$ (deg)                                   | 64.890(10)                                                        |
| $\beta$ (deg)                                    | 88.070(10)                                                        |
| $\gamma$ (deg)                                   | 71.110(10)                                                        |
| <i>V</i> (Å <sup>3</sup> )                       | 630.8(2)                                                          |
| <i>Z</i>                                         | 2                                                                 |
| <i>D</i> <sub>calc</sub> (g cm <sup>-3</sup> )   | 1.328                                                             |
| <i>T</i> (K)                                     | 298(2)                                                            |
| $\lambda$ (Mo-K $\alpha$ )                       | 0.71073                                                           |
| $\mu$ (mm <sup>-1</sup> )                        | 0.101                                                             |
| 2 $\theta$ range (deg)                           | 50.52                                                             |
| Limiting indices                                 | -10 ≤ <i>h</i> ≤ 10<br>-10 ≤ <i>k</i> ≤ 10<br>-11 ≤ <i>l</i> ≤ 11 |
| <i>F</i> (000)                                   | 268                                                               |
| No. of Reflns. Measured                          | 6142                                                              |
| No. Unique Reflns. [ <i>R</i> ( <i>int</i> )]    | 2271                                                              |
| No. of Reflns. used                              | 2092                                                              |
| No. of Parameters                                | 197                                                               |
| GOF on <i>F</i> <sup>2</sup>                     | 1.055                                                             |
| <i>R</i> / [ <i>I</i> > 2 $\sigma$ ( <i>I</i> )] | 0.0474                                                            |

|                                                                     |                  |
|---------------------------------------------------------------------|------------------|
| <i>wR2</i>                                                          | 0.1258           |
| Final diff. Fourier<br>map ( $e^{-}\cdot\text{\AA}^{-3}$ ) max, min | 0.229,<br>-0.207 |

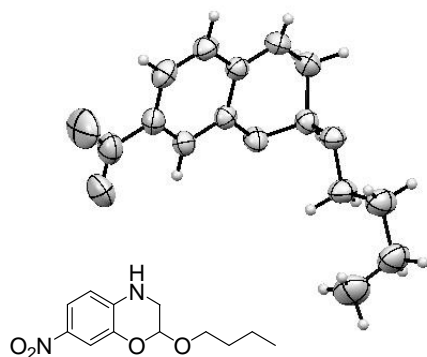

**Figure 1.** ORTEP diagram of X-ray crystal structure of **7a**

## Computational Studies

All computations were performed using the Gaussian 09<sup>2</sup> program package, at the B3LYP/6-31-G(d) level of theory<sup>3</sup>. Reactants and products structures were optimized using the B3LYP functional and the 6-31-G(d) basis set. The stationary points were characterized by frequency calculations in order to verify that TSs had one and only one imaginary frequency. Distances and bond lengths are given in Å. The relative energies are given in kcal mol<sup>-1</sup>.

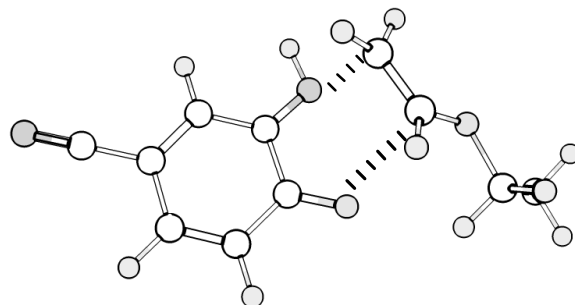

Total energy -686.226814 au.

Relative energy relative to **1b** + **4** 12.70 Kcal/mol

**Figure 2.** Transition structure of **8b**

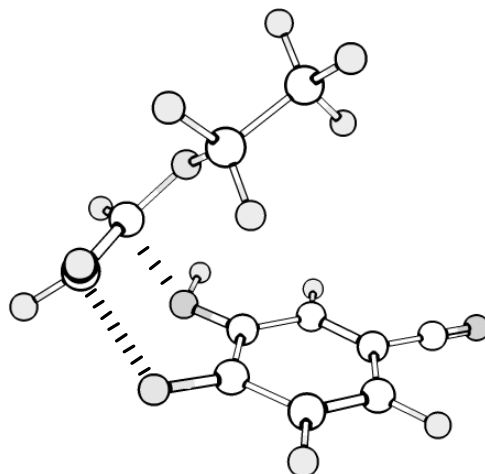

Total energy -686.2145657 au.

Relative energy relative to **1b** + **4** 20.39 Kcal/mol

**Figure 3.** Transition structure of counter regio isomer of **8b**

### Cartesian coordinates with the computed total energies

TS-1 of **8b**

-686.226814 au.

|   |              |              |              |
|---|--------------|--------------|--------------|
| C | -3.123186000 | -0.150768000 | -0.031744000 |
| C | -2.672221000 | -1.492515000 | 0.245684000  |
| C | -1.347076000 | -1.807887000 | 0.219054000  |
| C | -0.340239000 | -0.826814000 | -0.144209000 |
| C | -0.822383000 | 0.529357000  | -0.485958000 |
| C | -2.210493000 | 0.836062000  | -0.341375000 |
| O | 0.884310000  | -1.073430000 | -0.125536000 |
| C | 2.194371000  | 0.828454000  | 0.902557000  |

|   |              |              |              |
|---|--------------|--------------|--------------|
| C | 1.415265000  | 1.946854000  | 0.687067000  |
| N | 0.105493000  | 1.401112000  | -0.885879000 |
| O | 3.272897000  | 0.619411000  | 0.163741000  |
| C | 3.943754000  | -0.650991000 | 0.343980000  |
| C | 4.993877000  | -0.777644000 | -0.741449000 |
| C | -4.520414000 | 0.147656000  | 0.028762000  |
| N | -5.659416000 | 0.383846000  | 0.085357000  |
| H | -3.416756000 | -2.243942000 | 0.491841000  |
| H | -0.998230000 | -2.810117000 | 0.448027000  |
| H | -2.552351000 | 1.849079000  | -0.541052000 |
| H | 1.984572000  | 0.115256000  | 1.694413000  |
| H | 1.822241000  | 2.748553000  | 0.081955000  |
| H | 0.681404000  | 2.209714000  | 1.439869000  |
| H | -0.331524000 | 2.326417000  | -0.994176000 |
| H | 3.190119000  | -1.439841000 | 0.279607000  |
| H | 4.397397000  | -0.662037000 | 1.344203000  |
| H | 5.530612000  | -1.725478000 | -0.626997000 |
| H | 5.719342000  | 0.040094000  | -0.684026000 |
| H | 4.525443000  | -0.760834000 | -1.729865000 |

TS-2 of regio isomer of **8b**

-686.2145657 au.

|   |              |              |              |
|---|--------------|--------------|--------------|
| C | -2.334524000 | -0.087423000 | 0.064705000  |
| C | -2.113092000 | -0.684052000 | -1.222276000 |
| C | -0.932054000 | -1.316805000 | -1.501338000 |
| C | 0.067377000  | -1.500019000 | -0.483906000 |
| C | -0.168427000 | -0.909153000 | 0.834747000  |
| C | -1.365084000 | -0.157114000 | 1.047025000  |
| O | 1.173814000  | -2.079612000 | -0.712127000 |
| C | 2.843526000  | -0.949519000 | -0.147289000 |
| C | 2.511479000  | -0.010361000 | 0.826314000  |
| N | 0.822124000  | -1.058451000 | 1.714839000  |
| C | -3.564872000 | 0.601786000  | 0.314899000  |
| N | -4.564477000 | 1.166025000  | 0.508568000  |
| O | 2.079368000  | 1.247621000  | 0.582362000  |
| C | 1.861586000  | 1.667361000  | -0.778497000 |
| C | 1.234700000  | 3.048249000  | -0.732314000 |
| H | -2.894927000 | -0.608534000 | -1.971628000 |
| H | -0.739779000 | -1.753302000 | -2.476559000 |
| H | -1.533452000 | 0.310550000  | 2.013508000  |
| H | 2.947306000  | -0.686375000 | -1.190548000 |
| H | 3.329273000  | -1.856697000 | 0.181256000  |
| H | 2.907722000  | -0.101164000 | 1.829579000  |
| H | 0.644445000  | -0.447645000 | 2.523520000  |
| H | 1.208226000  | 0.954600000  | -1.292796000 |
| H | 2.828352000  | 1.687028000  | -1.300621000 |
| H | 1.076630000  | 3.420053000  | -1.750128000 |

|   |             |             |              |
|---|-------------|-------------|--------------|
| H | 1.885506000 | 3.751056000 | -0.202933000 |
| H | 0.268027000 | 3.015652000 | -0.220803000 |

Benzoxazine derivative **8b**

-686.3243273 au.

|   |              |              |              |
|---|--------------|--------------|--------------|
| C | -3.337514000 | 0.796308000  | 0.035613000  |
| C | -3.110069000 | -0.558135000 | 0.327789000  |
| C | -1.805779000 | -1.039686000 | 0.359083000  |
| C | -0.729371000 | -0.192658000 | 0.098062000  |
| C | -0.944889000 | 1.170423000  | -0.209181000 |
| C | -2.255211000 | 1.650034000  | -0.233386000 |
| O | 0.527752000  | -0.730664000 | 0.132430000  |
| C | 1.647163000  | 0.179847000  | 0.118197000  |
| C | 1.384880000  | 1.325760000  | -0.852566000 |
| N | 0.160566000  | 1.992828000  | -0.438208000 |
| O | 2.762583000  | -0.508386000 | -0.309110000 |
| C | 3.255079000  | -1.494758000 | 0.609395000  |
| C | 4.539328000  | -2.065768000 | 0.035985000  |
| C | -4.672537000 | 1.313623000  | 0.002962000  |
| N | -5.757354000 | 1.734909000  | -0.024755000 |
| H | -3.946431000 | -1.217550000 | 0.531250000  |
| H | -1.596501000 | -2.080281000 | 0.585090000  |
| H | -2.439821000 | 2.695622000  | -0.463275000 |
| H | 1.771868000  | 0.560323000  | 1.144790000  |
| H | 1.339681000  | 0.904149000  | -1.868853000 |
| H | 2.219165000  | 2.030764000  | -0.805153000 |
| H | -0.047258000 | 2.849802000  | -0.935220000 |
| H | 2.500488000  | -2.278192000 | 0.746464000  |
| H | 3.433980000  | -1.020928000 | 1.587195000  |
| H | 4.947636000  | -2.825926000 | 0.710639000  |
| H | 5.289204000  | -1.279298000 | -0.096680000 |
| H | 4.351890000  | -2.531035000 | -0.936843000 |

Regio isomer of **8b**

-686.3181633 au.

|   |              |              |             |
|---|--------------|--------------|-------------|
| C | -2.009947000 | 0.828416000  | 1.739235000 |
| C | -2.079863000 | -0.536933000 | 2.057138000 |
| C | -0.920404000 | -1.306058000 | 2.012515000 |
| C | 0.293014000  | -0.731605000 | 1.645252000 |
| C | 0.377946000  | 0.638939000  | 1.314190000 |
| C | -0.784278000 | 1.410695000  | 1.374750000 |
| O | 1.399086000  | -1.535490000 | 1.558446000 |
| C | 2.651862000  | -0.857260000 | 1.704786000 |
| C | 2.785452000  | 0.363900000  | 0.787490000 |



|   |              |              |              |
|---|--------------|--------------|--------------|
| N | 1.610126000  | 1.179901000  | 0.962316000  |
| C | -3.190272000 | 1.639117000  | 1.784512000  |
| N | -4.149229000 | 2.297805000  | 1.820168000  |
| O | 3.113099000  | 0.056784000  | -0.558055000 |
| C | 2.162650000  | -0.689678000 | -1.328217000 |
| C | 2.682968000  | -0.747793000 | -2.755138000 |
| H | -3.027569000 | -0.981561000 | 2.339301000  |
| H | -0.936355000 | -2.364285000 | 2.252714000  |
| H | -0.742652000 | 2.468234000  | 1.130512000  |
| H | 3.420134000  | -1.590683000 | 1.456112000  |
| H | 2.777334000  | -0.540842000 | 2.749578000  |
| H | 3.660239000  | 0.934170000  | 1.121984000  |
| H | 1.608097000  | 2.079294000  | 0.500920000  |
| H | 1.180794000  | -0.198102000 | -1.295985000 |
| H | 2.042596000  | -1.699588000 | -0.915493000 |
| H | 1.990285000  | -1.313173000 | -3.388169000 |
| H | 3.662013000  | -1.236644000 | -2.789430000 |
| H | 2.789270000  | 0.260177000  | -3.169116000 |

4-cyano-*o*-quinone monoimine (**2b**)

-453.8138318 au.

|   |              |              |              |
|---|--------------|--------------|--------------|
| C | -1.019196000 | 0.758972000  | 0.000755000  |
| C | -1.028743000 | -0.710378000 | -0.000825000 |
| C | 0.108714000  | -1.437911000 | -0.006522000 |
| C | 1.419610000  | -0.779423000 | -0.011428000 |
| C | 1.424168000  | 0.751579000  | -0.008564000 |
| C | 0.146329000  | 1.457243000  | -0.002765000 |
| C | -2.281511000 | 1.438202000  | 0.006849000  |
| N | -3.317790000 | 1.966475000  | 0.011874000  |
| O | 2.481916000  | -1.386785000 | -0.014888000 |
| N | 2.522520000  | 1.414328000  | -0.011403000 |
| H | -1.997940000 | -1.200701000 | 0.002106000  |
| H | 0.096803000  | -2.523044000 | -0.008144000 |
| H | 0.170356000  | 2.541852000  | -0.001109000 |
| H | 3.301464000  | 0.737038000  | -0.015585000 |

Ethyl vinyl ether (**4**)

-232.4332375 au.

|   |              |              |             |
|---|--------------|--------------|-------------|
| C | -1.910221000 | -1.047404000 | 0.003021000 |
| C | -1.678859000 | 0.269543000  | 0.002703000 |
| O | -0.487921000 | 0.920137000  | 0.001565000 |
| C | 0.693871000  | 0.118053000  | 0.000959000 |
| C | 1.890770000  | 1.052352000  | 0.000001000 |
| H | -2.935252000 | -1.399697000 | 0.003566000 |
| H | -1.127315000 | -1.796657000 | 0.002413000 |

|   |              |              |              |
|---|--------------|--------------|--------------|
| H | -2.489185000 | 0.994225000  | 0.002885000  |
| H | 0.693474000  | -0.531055000 | -0.886451000 |
| H | 0.694597000  | -0.530691000 | 0.888632000  |
| H | 2.821092000  | 0.473991000  | -0.000479000 |
| H | 1.881134000  | 1.693226000  | 0.887309000  |
| H | 1.879991000  | 1.692859000  | -0.887559000 |

### Notes & References:

- 1) The proton attached to the nitrogen atom is merged with the base line.
- 2) Frisch, M. J.; et al. *Gaussian 09, revision A.02*; Gaussian, Inc.: Wallingford, CT, 2009.
- 3) (a) Becke, A. D. *J. Chem. Phys.* **1993**, 98, 5648–5652. (b) Lee, C.; Yang, W.; Parr, R. *Phys. Rev. B* **1988**, 37, 785–789.
